# Supplementary material
Source: HighWire-hosted journal article supplement (https://bmjopen.bmj.com/content/7/6/e015659)
Supplement: inline-supplementary-material-1 [file inline-supplementary-material-1.pdf]

## Appendix 1. Innovative risk stratification pathway and standard care

### The current status of standard care

In current clinical practice, General Practitioners (GPs) rely upon abnormal liver function tests (LFTs) to identify patients who may be at risk of chronic liver disease. Subsequently, this may prompt a referral to secondary care (Figure 1.1).

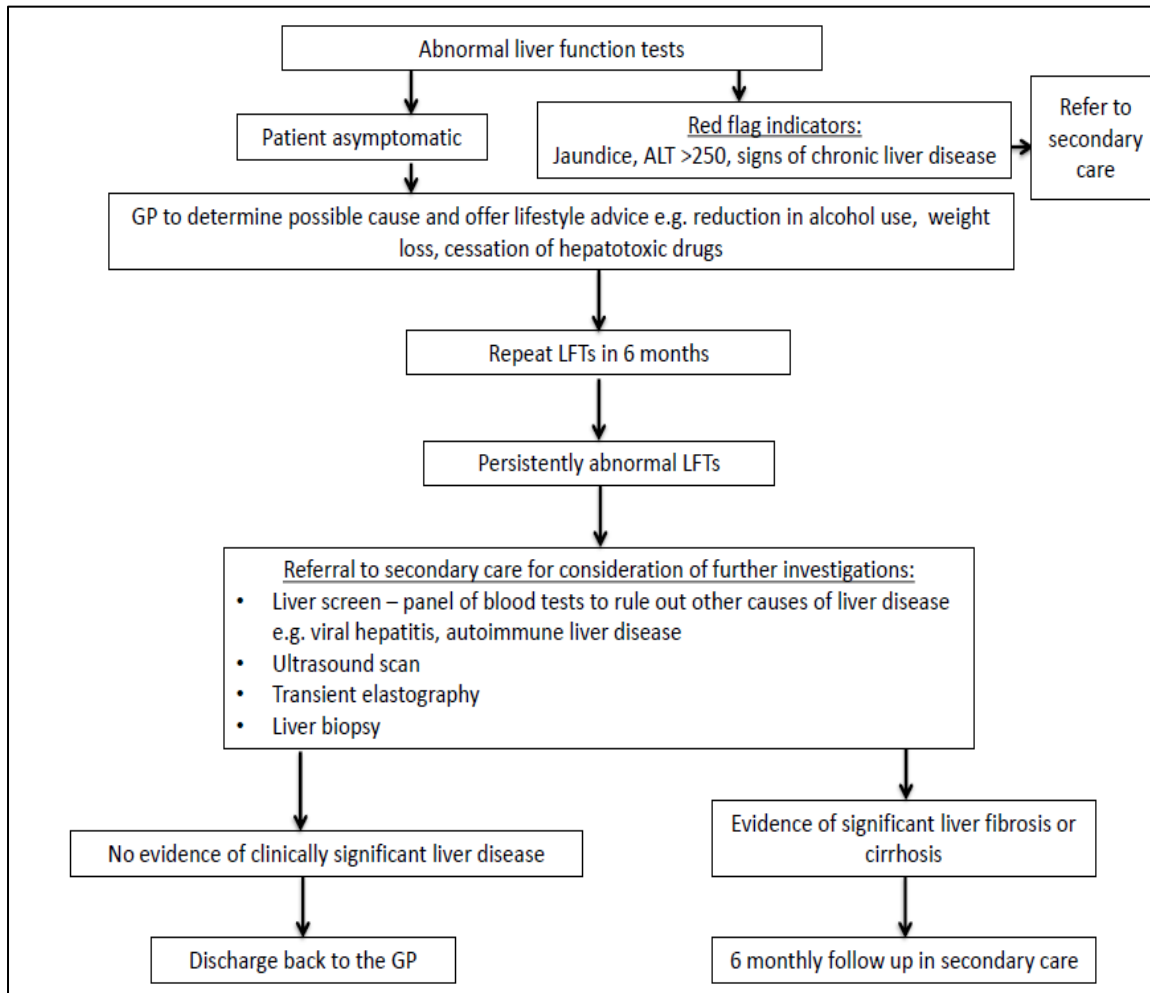

**Supplementary Figure 1.1: An outline of the standard care pathway**

### Use of non-invasive tests to identify chronic liver disease

Several non-invasive tests have been developed which use novel imaging techniques or serological markers to measure the amount of fibrosis that is present in the liver. Imaging based modalities such as transient elastography (Fibroscan®, Echosens, Paris) have been demonstrated to be an excellent diagnostic test when used to identify patients who may have significant liver disease or cirrhosis <sup>[1]</sup>. A Fibroscan® calculates the stiffness of the liver by measuring the propagation of an elastic shear wave <sup>[2]</sup> for which different thresholds, now established in all major aetiologies, have been demonstrated to correlate with stages of liver fibrosis <sup>[3-6]</sup>.

Using non-invasive tests to provide a timely diagnosis for these patients is clinically important so future management such as hepatocellular carcinoma and variceal surveillance can be organised or a referral for a liver transplant can be planned. Completion of the test may also be the stimulus required for patients with milder forms of fibrotic injury to alter their lifestyle and reduce the probability of their liver disease progressing.

### The risk stratification pathway

The risk stratification pathway (RSP) encompasses a new algorithm to target patients in a community setting who have been identified to have a defined risk factor for developing chronic liver disease<sup>[7]</sup>. This includes patients who have been documented to have hazardous alcohol use, Type 2 diabetes or a raised ALT with no other cause identified. A patient's risk of chronic liver disease is subsequently stratified by completion of a Fibroscan® (Figure 1.2).

A Fibroscan® measurement stratifies a patient to be at either low or high risk of having clinically significant liver disease. Patients at low risk receive brief lifestyle advice from the nursing staff along with a British Liver Trust 'Looking After Your Liver' leaflet<sup>[8]</sup> but are ultimately discharged back to the care of the GP without the need for any specialist follow up. Patients at high risk with a raised liver stiffness result are reviewed by a consultant hepatologist in the community and where appropriate further investigations are requested or enrolment into cirrhosis surveillance programmes is organised. Following a patient's fibroscan and the results of any further investigations a patient can be stratified to have no/mild liver disease, significant liver disease or compensated cirrhosis.

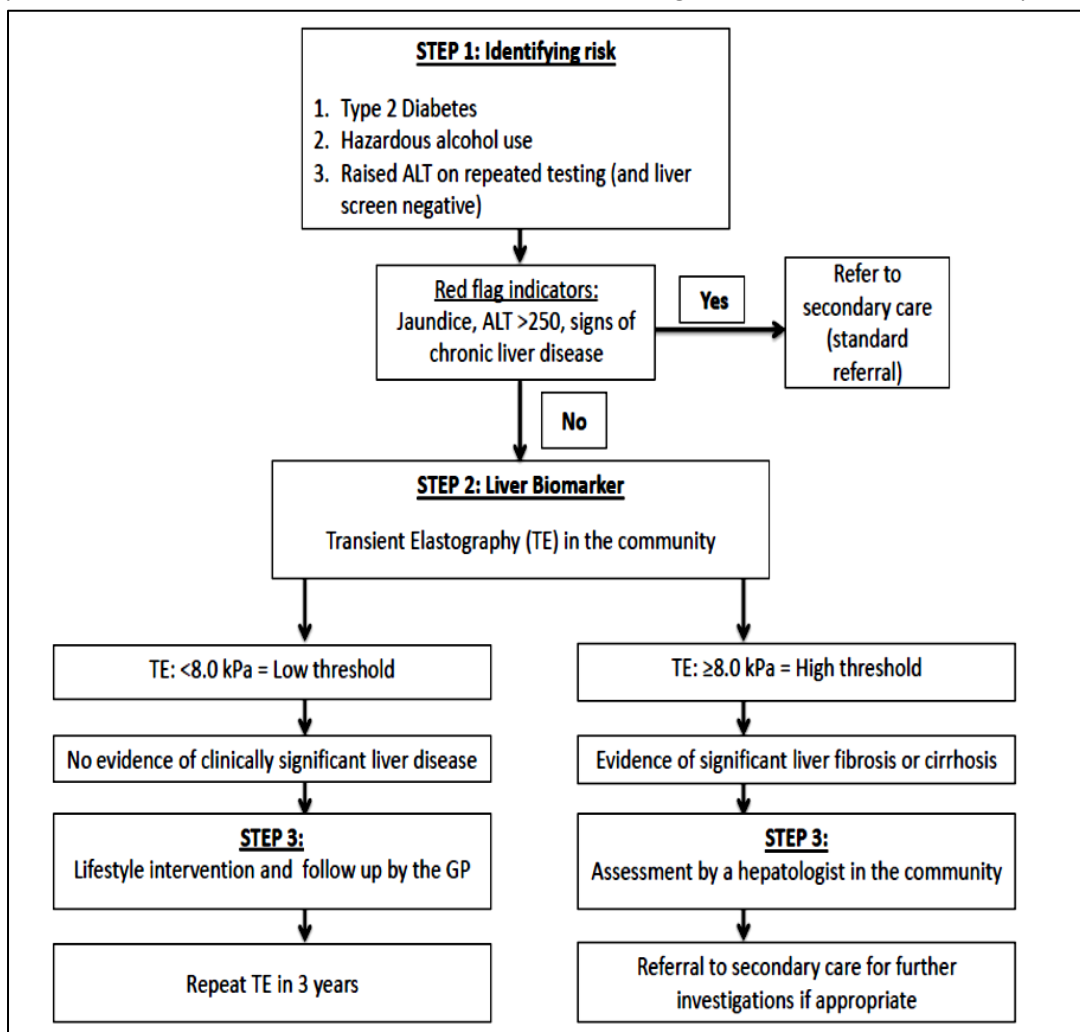

Supplementary Figure 1.2: The risk stratification pathway

## Appendix 2. Transition probabilities

### Annual probabilities of progression from undetected fibrosis NMD- and SLD- states

No studies were identified in which progression probabilities between different fibrosis stages (Stage 0 to Stage 1, Stage 1 to Stage 2, etc.), nor from NMD- or SLD- states of disease, were reported for NAFLD. The identified studies focused on long-term mortality in the NAFLD population (see for example the recent study <sup>[9]</sup>) and could not be used to calculate fibrosis progression probabilities. The only relevant data were obtained from a meta-analysis of studies that assessed paired liver biopsy specimens to estimate the rate of fibrosis progression in patients with NAFLD <sup>[10]</sup>. In this meta-analysis, annual fibrosis progression rate (FPR) was calculated as the difference in fibrosis stage between the first and last biopsy divided by the time between biopsies in years, and a pooled-weighted annual FPR with 95% confidence intervals was estimated. As the input parameter to the model, we have chosen a subgroup within the meta-analysis which best represents the UK population, and incorporates NAFLD patients with Stage 0 fibrosis at baseline biopsy (see Supplementary Table 7 in <sup>[10]</sup>). Specifically, the meta-analysis of eight studies from Western countries was used in which the mean FPR was equal to 0.12 (95%CI: 0.06, 0.18), corresponding to one stage of progression over 8.3 years. In the absence of other data, this estimate was used to calculate progression transition probabilities between NMD, SLD, and CC states, based on progression rates between stages of fibrosis, in the following way:

- time taken to progress from Stage 0 to Stage 4 fibrosis was calculated as 33.3 years ( $33.3 = 4 \times 8.33 = 4 \times (1/0.12)$ ).
- In accordance with expert opinion (NG, SR, MJ, GA, EW, TD, NT), it is assumed that the mean time taken to progress one fibrosis stage is shorter for more significant liver disease and that therefore, the progression rate between Stages 0 to 4 fibrosis is not linear. Hence, employing an exponential function in which the parameter has been used based on expert opinion (NG, SR, MJ, GA, EW, TD, NT, DH, RH) the following mean time intervals for transitions between different stages of fibrosis was derived, keeping total time taken to progress from Stage 0 to Stage 4 equal to 33.3 years:
  - **Stage 0 to 1:** 14.8 years
  - **Stage 1 to 2:** 9.2 years
  - **Stage 2 to 3:** 5.7 years
  - **Stage 3 to 4:** 3.6 years

These intervals were then used to obtain the progression rates between different stages of fibrosis assuming an initial distribution of patients between fibrosis stages 0-4 based on the RSP study (Table 2.1.), allowing the annual transition probabilities between the different health states (NMD/SLD/CC) to be calculated. The resultant probabilities (dependent on the cycle number) between NMD, SLD, and CC health states are presented in Figure 2.1.

**Supplementary Figure 2.1: Annual probability of progression from NMD- to SLD state, and from SLD- to CC state.**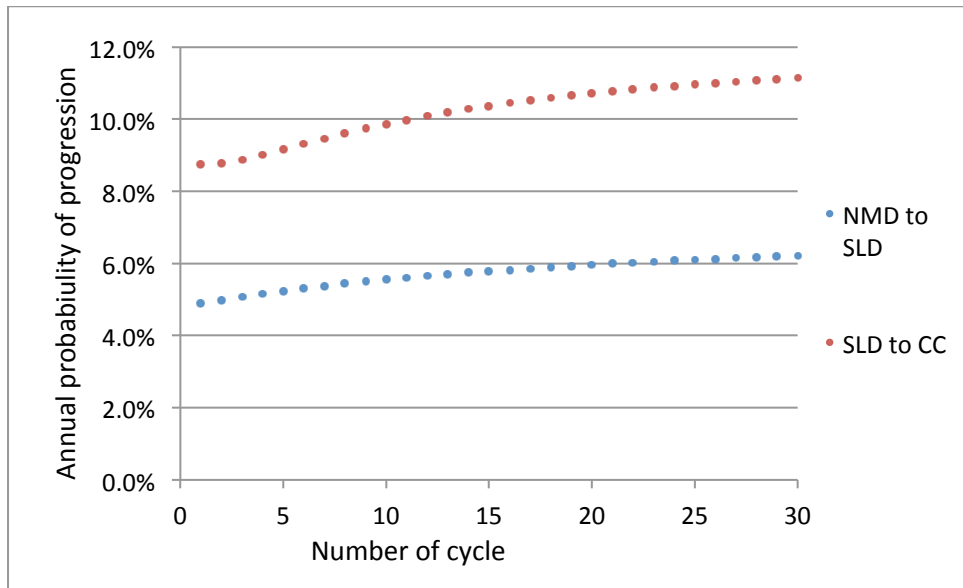**Supplementary Table 2.1: Initial distribution of patients between fibrosis stages 0-4**

| Fibrosis stages                   | 0              | 1     | 2             | 3    | 4           | Total      |
|-----------------------------------|----------------|-------|---------------|------|-------------|------------|
| % of patients in particular stage | 36.2%*         | 32.8% | 17.2%*        | 9.6% | 4.2%        | 100%       |
| Number of patients (%)**          | 149<br>(69.0%) |       | 58<br>(26.9%) |      | 9<br>(4.2%) | 216 (100%) |

\*Proportion of patients with Stage 0 fibrosis in NMD and Stage 2 fibrosis in SLD. (From published meta-analysis - at baseline, the distribution of fibrosis for stages 0, 1, 2, 3, and 4 was 35.8%, 32.5%, 16.7%, 9.3%, and 5.7%, respectively <sup>[10]</sup>).

\*\*Based on RSP feasibility study <sup>[7]</sup>.

Annual probabilities of progression from undetected fibrosis NMD- and SLD- states are summarized in Table 2.4a.

#### **Annual probabilities of fibrosis progression when the fibrosis stage has been diagnosed (transitions from NMD+/SLD+ state)**

No data were found to support estimation of the effect of detection of liver disease on the transition probabilities between NMD, SLD and CC health states. Despite there being many trials studying the effect of different treatments for NAFLD <sup>[11-13]</sup>, these studies report a change in mean fibrosis score focusing on the impact of intervention on short-term regression or stabilization of fibrosis/cirrhosis rather than on the reduction in rate (or probability) of fibrosis progression. Therefore, from these studies it was not possible to calculate the transition probabilities for the progression of liver fibrosis in those patients who are diagnosed and treated. An individual-patient dataset was obtained from an RCT which studied the histological effect of rosiglitazone in a NAFLD population (Fatty Liver Improvement with Rosiglitazone Therapy, FLIRT trial <sup>[14]</sup>). Sixty three patients were enrolled (32% patients had type 2 diabetes) all of whom had a liver biopsy at baseline and at 1 year. In this study, the intervention group was offered advice on lifestyle modifications and treated with rosiglitazone while the placebo group was offered advice about lifestyle modifications only. The intervention group was assumed to be equivalent to the identified/ detected arm within our model. As no specific treatment was given to the placebo group it was assumed that the fibrosis progression observed in this group would be equivalent to that seen in the unidentified/undetected arm within our model. Using the individual-patient data from this study, patients were distributed between the three different

health states within our model (NMD/SLD/CC) based upon the documented fibrosis stage at baseline and follow up at 1 year. Subsequently, the transition of patients between the health states could be observed and the effect of rosiglitazone on progression between the different health states could be calculated in relation to the placebo group who did not receive this treatment.

Tables 2.2a and 2.2b summarise the transition of patients in the intervention and control groups.

**Supplementary Table 2.2a: Number of patients who transition between NMD (fibrosis stage 0-1), SLD (fibrosis stage 2-3), CC (fibrosis stage 4) health states in the intervention group after 1 year (rosiglitazone, 32/63 patients, <sup>[14]</sup>)**

| Number of patients | to NMD | to SLD | to CC | Total |
|--------------------|--------|--------|-------|-------|
| from NMD           | 8      | 4      | 0     | 12    |
| from SLD           | 4      | 14     | 1     | 19    |
| from CC            | 0      | 0      | 1     | 1     |
| Total              | 12     | 18     | 2     | 32    |

**Supplementary Table 2.2b: Number of patients who transition between NMD (fibrosis stage 0-1), SLD (fibrosis stage 2-3), CC (fibrosis stage 4) health states in the placebo group after 1 year (31/63 patients, <sup>[14]</sup>)**

|          | to NMD | to SLD | to CC | Total |
|----------|--------|--------|-------|-------|
| from NMD | 3      | 3      | 0     | 6     |
| from SLD | 6      | 16     | 2     | 24    |
| from CC  | 0      | 1      | 0     | 1     |
| Total    | 9      | 20     | 2     | 31    |

From the above transition matrices (ignoring regression to earlier health states) a relative risk (RR) was calculated to reflect the impact of the intervention on the progression of liver disease between NMD, SLD, and CC health states (Table 3b):

NMD->SLD:  $(4/12) / (3/6) = 0.67$  [RR=0.67, 95% CI: 0.21 to 2.07, p=0.7]

SLD->CC:  $(1/19) / (2/24) = 0.63$  [RR=0.63, 95% CI: 0.06 to 6.45, p=0.7]

The RR presented here reflects the effect of early detection and treatment on clinically significant liver disease assuming that:

- Lifestyle intervention is offered to all patients irrespective of the whether they are identified to have clinically significant liver disease.
- Early detection leads to the treatment of clinically significant NAFLD with a glitazone.

Rosiglitazone was withdrawn from clinical use in the UK in 2010 due to an increase in cardiovascular risk <sup>[15]</sup>.

Therefore, we assume that the clinical effectiveness of rosiglitazone on liver disease progression is similar to other glitazones (e.g. pioglitazone), as supported by published evidence <sup>[16, 17]</sup>. The first assumption makes the effect of our RSP conservative as it may be unrealistic to assume that all patients in both RSP and SC arms will be offered a life-style intervention by the GP. It is also unclear if the effect of lifestyle intervention differs depending on whether a patient is diagnosed with an invasive investigation in a hospital setting compared with a non-invasive test in the community.

In contrast, the second assumption is more optimistic as use of a glitazone is not a standard treatment for all NAFLD in current clinical practice. The RCT also only studied the histological effects of treatment over 1 year and this may be too short to determine whether the subsequent effect on the progression of disease is sustained.

In the extension of this RCT, 22 patients continued on treatment while 18 patients who were initially within the placebo group were started on rosiglitazone at 12 months; all of these patients were observed for a total 40 months<sup>[18]</sup>. In the first group the mean fibrosis score was 1.75 at 40 months, compared with 1.61 at 12 months (an increase of 0.14) while in the second group the mean fibrosis score was 1.93 at 40 months, compared with 1.89 at 12 months (an increase of 0.03). This suggests that the long-term impact of rosiglitazone may not be as significant, when compared with the short-term effects.

Annual probabilities of fibrosis progression when the fibrosis stage has been diagnosed (transitions from NMD+/SLD+ state) are summarized in Table 2.4b.

### **Annual transition probabilities from significant liver disease (SLD-/SLD+) and compensated cirrhosis (CC-/CC+) to decompensated cirrhosis, HCC, and death (Table 2.4a-b)**

#### *Significant liver disease to HCC*

The model assumes that patients can progress from significant liver disease (SLD-/SLD+) to HCC but no data to estimate this probability was available. In their cost-utility analysis<sup>[16]</sup> the authors calculated the transition probability from the combined health states of fibrosis stages 3 and 4 to HCC, based on a study of 247 NAFLD patients with fibrosis stages 3 and 4<sup>[19]</sup> in which 52.2% had cirrhosis (stage 4). Hence, in our model we approximate transition probability from SLD to HCC, assuming that the progression probability from fibrosis stage 2/3 (SLD) is similar to progression from fibrosis stage 3/4 (see Table 2.4a-b).

#### *Significant liver disease to death*

It is assumed that mortality from states NMD and SLD (fibrosis stages 0-3) is not increased due to liver disease at this stage of the disease. So, as a base, age-dependent mortality for the general population of England was assumed for transition probability from NMD/SLD to death, and to account for higher mortality due to diabetes, excess mortality (calculated from diabetes-related death rate of 1.4%, from 10-year follow-up in UKPDS study<sup>[20]</sup>) was added to general-population mortality.

#### *Compensated cirrhosis*

Progression from compensated cirrhosis (CC) through to decompensation and death were approximated based on published sources and using expert opinion (Table 2.3 for elicitation methods and details of the expert panel members). It is assumed that the available data within the literature reflects diagnosed cases of cirrhosis (CC+) and therefore transition probabilities were adjusted for undiagnosed cases of cirrhosis (CC-) based on expert opinion (Table 2.3a-b).

Results of the study based on data from the UK Clinical Practice Research Datalink (CPRD) for 4537 patients diagnosed with cirrhosis between 1987 and 2002<sup>[21]</sup> were used to estimate transition probabilities between stages of cirrhosis according to the Baveno classification (including decompensation). Since there were no results reported

for NAFLD separately, we used data for the non-alcohol related cirrhosis subgroup, which accounted for 49.2% of the cohort (viral hepatitis – 5.2%, autoimmune liver disease – 1.1%, metabolic liver disease – 7.8%, not classified – 38.1%). Annual transition probabilities were taken from the probabilities of progression in the first year after diagnosis (reported in Table 2 in <sup>[21]</sup>), as annual probabilities for all years were not provided. It was assumed that these patients were known to have cirrhosis (CC+). To approximate transition probabilities from undetected cirrhosis (from CC-) we used transition probabilities for CC+ adjusted by the responses of our panel of experts. (Table 2.3).

**Supplementary Table 2.3. Responses obtained from expert panel\***

| Question related to NAFLD                                                                                                                                                                                                                                                                                                                                                                                                                                                                                                                                                                                                                                                                                                                                                                                                                                                                                               | Responses                                             | Calculation of transition probability                                                                                                                                                                                                                                                                                        |
|-------------------------------------------------------------------------------------------------------------------------------------------------------------------------------------------------------------------------------------------------------------------------------------------------------------------------------------------------------------------------------------------------------------------------------------------------------------------------------------------------------------------------------------------------------------------------------------------------------------------------------------------------------------------------------------------------------------------------------------------------------------------------------------------------------------------------------------------------------------------------------------------------------------------------|-------------------------------------------------------|------------------------------------------------------------------------------------------------------------------------------------------------------------------------------------------------------------------------------------------------------------------------------------------------------------------------------|
| <p><b>A1.</b> From the literature, we have identified the annual rate of patients progressing from compensated NAFLD through the stages of the Baveno classification, to decompensated NAFLD. (Fleming 2010)</p> <p>Patients with Baveno stage 1 (no ascites, no varices) progressing to Baveno stage 2 (varices, no ascites) over the course of one year = 32 patients out of 1000.</p> <p>How many patients per year, <u>who are not aware of their diagnosis of compensated NAFLD</u> would you expect to progress from Baveno stage 1 to Baveno stage 2?</p> <p>a. The number of patients progressing from Baveno stage 1 to Baveno stage 2 would stay the same.</p> <p>b. The number of patients progressing from Baveno stage 1 to Baveno stage 2 would increase by X=..... patients, <math>X &lt; 32</math></p> <p>c. The number of patients progressing from Baveno stage 1 to Baveno stage 2 would double.</p> | <p>40% increase, 16 patients</p>                      | <p>Minimal multiplier: 1.4<br/>Maximal multiplier: 1.5(=(16+32)/32)<br/>Mean multiplier: 1.45</p> <p>Annual probability of progression from CC- Baveno stage I to CC- Baveno stage II was obtained by adjusting annual probability of progression from CC+ Baveno stage I to CC+ Baveno stage II using above multiplier.</p> |
| <p><b>A2.</b> From the literature we have identified that 6 out of 100 patients known to have compensated NAFLD will decompensate over the course of 1 year. (Mahady, 2012)</p> <p>How many patients out of 100, <u>who are not aware of their diagnosis of compensated NAFLD</u>, would you expect to decompensate per year?</p> <p>a. The number of patients who would decompensate would stay the same</p> <p>b. The number of patients who would decompensate would increase by X=..... patients, <math>X &lt; 6</math></p> <p>c. The number of patients who would</p>                                                                                                                                                                                                                                                                                                                                              | <p>3 patients, 3 patients, 6 patients, 4 patients</p> | <p>Minimal multiplier: 1.5(=(3+6)/6)<br/>Maximal multiplier: 2 (=(6+6)/6)<br/>Mean multiplier: 1.67</p> <p>Annual probability of progression from CC- to DC was obtained by adjusting probability of progression from CC+ to DC using above multiplier.</p>                                                                  |

| Question related to NAFLD                                                                                                                                                                                                                                                                                                                                                                                                                                                                                                                                                                                                                          | Responses                                                                                      | Calculation of transition probability                                                                                                                                                                                                                                                                      |
|----------------------------------------------------------------------------------------------------------------------------------------------------------------------------------------------------------------------------------------------------------------------------------------------------------------------------------------------------------------------------------------------------------------------------------------------------------------------------------------------------------------------------------------------------------------------------------------------------------------------------------------------------|------------------------------------------------------------------------------------------------|------------------------------------------------------------------------------------------------------------------------------------------------------------------------------------------------------------------------------------------------------------------------------------------------------------|
| decompensate would double.                                                                                                                                                                                                                                                                                                                                                                                                                                                                                                                                                                                                                         |                                                                                                |                                                                                                                                                                                                                                                                                                            |
| <p><b>A3.</b> From the literature we have identified that 7 out of 100 patients, known to have compensated NAFLD will die over the course of 1 year. (Fleming 2010)</p> <p>What would you expect the all-cause mortality rate to be for patients who have compensated NAFLD but <u>who are not aware of their diagnosis</u>?</p> <p>a. The number of patients who would die would stay the same.</p> <p>b. The number of patients who would die would increase by <math>X = \dots\dots\dots</math>, <math>X &lt; 7</math></p> <p>c. The number of patients who would die would double.</p>                                                         | <p>2 patients, 1 patient, 7 patients, 0.1 patients (1 additional to 70/1000)</p>               | <p>Minimal multiplier: <math>1.014 = ((0.1+7)/7)</math></p> <p>Maximal multiplier: <math>2 = ((7+7)/7)</math></p> <p>Mean multiplier: 1.36</p> <p>Annual probability of progression from CC- to death was obtained by adjusting probability of progression from CC+ to death using above multiplier.</p>   |
| <p><b>A4.</b> From the literature we have identified that 30 out of 1000 patients known to have compensated NAFLD will develop a Hepatocellular carcinoma (HCC) over the course of 1 year. (Mahady 2012)</p> <p>How many patients out of 1000, <u>who are not aware of their diagnosis of compensated NAFLD</u>, would you expect to develop an HCC per year?</p> <p>a. The number of patients to develop an HCC would stay the same</p> <p>b. The number of patients to develop an HCC would increase by <math>X = \dots\dots\dots</math> patients, <math>X &lt; 30</math>.</p> <p>c. The number of patients to develop and HCC would double.</p> | <p>3 patients, 0.5 patients (5 additional to 300/1000), 10 patients, 1 patient, 1 patient,</p> | <p>Minimal multiplier: <math>1.033 = ((30+1)/30)</math></p> <p>Maximal multiplier: 1.33 <math>(= (10+30)/30)</math></p> <p>Mean multiplier: 1.10</p> <p>Annual probability of progression from CC- to HCC was obtained by adjusting probability of progression from CC+ to HCC using above multiplier.</p> |

\*Members: Dr Neil Guha, Dr Toby Delahooke, Dr Martin James, Dr Stephen Ryder, Dr Emilie Wilkes – Nottingham University Hospitals NHS Trust; Dr Nicholas Taylor – Derby Hospitals NHS Foundation Trust.

#### *Compensated cirrhosis to HCC*

The transition probability from compensated cirrhosis to hepatoma reported in a cost-utility analysis<sup>[16]</sup> which was based on 3 observational studies of cirrhosis patients<sup>[22] [23] [24]</sup>, was used as the transition probability from CC+ to HCC. No data for transition probabilities from undetected cirrhosis (CC-) to HCC were available, so the responses of a panel of experts (Table 2.3) were used to approximate the transition probability CC- to HCC.

#### *Compensated cirrhosis to death*

Mortality probabilities from the CC state were based on the result of the above mentioned UK population-based study<sup>[21]</sup>, for non-alcohol related cirrhosis, and it was assumed that observed mortality for cirrhosis patients reflected detected cirrhosis (CC+). Consequently, to approximate transition probabilities from undetected cirrhosis



(from CC-) to death we used transition probabilities for CC+ adjusted by the responses of a panel of experts. (Table 2.3).

#### **Transition probabilities for end stage liver disease (Table 2.4c)**

It is assumed that progression in end stage liver disease is not affected by the earlier diagnosis of significant liver disease or compensated cirrhosis (SLD and CC); nor by the earlier identification of patients with risk factors for chronic liver disease (NMD). The RSP is not aimed at detecting the complications of cirrhosis hence for both the RSP and SC, the transition probabilities in this part of the model are identical. Published studies on the natural history of end stage liver disease were used and where possible inclusion of data specific for NAFLD or non-alcohol related aetiologies (see Table 2.4c).

Supplementary Table 2.4. Transition probabilities

| <b>2.4a. Annual probabilities from undetected fibrosis (NMD- and SLD-) and cirrhosis (CC-) states</b> |                                                                                   |                                                                                                                                                                                                                                                                                                                                                                                                                                         |                                                                                           |
|-------------------------------------------------------------------------------------------------------|-----------------------------------------------------------------------------------|-----------------------------------------------------------------------------------------------------------------------------------------------------------------------------------------------------------------------------------------------------------------------------------------------------------------------------------------------------------------------------------------------------------------------------------------|-------------------------------------------------------------------------------------------|
| <b>Transition</b>                                                                                     | <b>Annual probability</b>                                                         | <b>Data and assumptions</b>                                                                                                                                                                                                                                                                                                                                                                                                             | <b>Source</b>                                                                             |
| <b>NMD- to SLD</b>                                                                                    | Dependent on cycle number (see Figure 2.1, Appendix 2)                            | - Average fibrosis progression rate (between fibrosis stages 0-4), for NAFLD patients, baseline fibrosis stage 0, Western countries (meta-analysis of 8 studies): 0.12 (0.06-0.18) <sup>[10]</sup><br>- Assumed exponential decrease of time to progression between subsequent fibrosis stages (see Appendix 2)<br>- Initial distribution of patients between fibrosis stages 0-4 from feasibility study and Table 2 in <sup>[10]</sup> | Supplementary Table 7 in <sup>[10]</sup> and feasibility study <sup>[7]</sup>             |
| <b>SLD- to CC</b>                                                                                     | Dependent on cycle number (see Figure 2.1)                                        |                                                                                                                                                                                                                                                                                                                                                                                                                                         |                                                                                           |
| <b>SLD- to HCC</b>                                                                                    | 0.4%                                                                              | Annual probability of developing HCC from fibrosis stages 3 or 4: 0.004 (NAFLD patients), no 95% CI provided and no data on the probability of developing HCC from fibrosis stages 2 or 3                                                                                                                                                                                                                                               | Table 1 in <sup>[16]</sup> , calculated from <sup>[19]</sup>                              |
| <b>CC- to DC*</b>                                                                                     | CCI ->DCIII: 7.3%;<br>CCI->DCIV: 1.3%;<br>CCII->DCIII: 28.5%;<br>CCII->DCIV: 8.5% | Data for detected CC (CC+ to DC, see 3b below), adjusted by expert panel answers (question A1, see Table 2.3)                                                                                                                                                                                                                                                                                                                           | <sup>[21]</sup> and expert panel                                                          |
| <b>CC- to HCC</b>                                                                                     | 3.3%                                                                              | Data for detected CC (CC+ to HCC, see 1b below), adjusted by expert panel answers (question A4, see Table 2.3)                                                                                                                                                                                                                                                                                                                          | <sup>[16]</sup> based on <sup>[22]</sup> <sup>[23]</sup> <sup>[24]</sup> and expert panel |
| <b>NMD-/SLD- to death</b>                                                                             | Probability dependent on age                                                      | - Mortality data for general population (life tables assuming percentage of males and initial age as in feasibility study <sup>[20]</sup> )<br>- Excess mortality due to diabetes (diabetes-related death rate of 1.4%, from 10-year follow-up in UKPDS study)                                                                                                                                                                          | ONS (life tables), feasibility study <sup>[7]</sup> , UKPDS study <sup>[20]</sup>         |
| <b>CC-to death*</b>                                                                                   | CCI ->death: 10.2%;<br>CCII->death: 9.0%                                          | Data for detected CC (CC+ to death, see 3b below) adjusted by expert panel answers (question A2, see Table 2.3)                                                                                                                                                                                                                                                                                                                         | <sup>[21]</sup> and expert panel                                                          |
| <b>2.4b. Annual probabilities from detected fibrosis (NMD+ and SLD+) and cirrhosis (CC+) states</b>   |                                                                                   |                                                                                                                                                                                                                                                                                                                                                                                                                                         |                                                                                           |
| <b>Transition</b>                                                                                     | <b>Annual</b>                                                                     | <b>Data and assumptions</b>                                                                                                                                                                                                                                                                                                                                                                                                             | <b>Source</b>                                                                             |

|                                                               | probability                                                                     |                                                                                                                                                                                                                                                                                                                                    |                                                                                    |
|---------------------------------------------------------------|---------------------------------------------------------------------------------|------------------------------------------------------------------------------------------------------------------------------------------------------------------------------------------------------------------------------------------------------------------------------------------------------------------------------------|------------------------------------------------------------------------------------|
| <b>NMD+ to SLD</b>                                            | Table 3a adjusted by RR=0.67                                                    | Annual probabilities for undetected NMD (NMD- to SLD, see 1a above) adjusted by RR=0.67 (95%CI: 0.21 to 2.07) from FLIRT trial <sup>[14]</sup> , effect of glitazone (see Tables 2.2a and 2.2b)                                                                                                                                    | Supplementary Table 7 in <sup>[10]</sup> and data from FLIRT trial <sup>[14]</sup> |
| <b>SLD+ to CC</b>                                             | Table 3a adjusted by RR=0.63                                                    | Annual probabilities for undetected SLD (SLD- to CC, see 1a above) adjusted by RR=0.63 (95%CI: 0.06 to 6.45) from <sup>[14]</sup> , effect of glitazone (see Tables 2.2a and 2.2b)                                                                                                                                                 |                                                                                    |
| <b>SLD+ to HCC</b>                                            | 0.4%                                                                            | As in 1a above, assumed to be the same as annual probability SLD- to HCC (no evidence indicating the effect of SLD detection on HCC development)                                                                                                                                                                                   | Table 1 in <sup>[16]</sup> , calculated from <sup>[19]</sup>                       |
| <b>CC+ to DC</b>                                              | CCI->DCIII: 6.4%;<br>CCI->DCIV:0.8%;<br>CCII->DCIII: 17.1%;<br>CCII->DCIV: 5.1% | Probabilities of progression between Baveno stages (I and II – compensated cirrhosis, III and IV – decompensated cirrhosis) during the 1 <sup>st</sup> year after diagnosis, Table 2 <sup>[21]</sup> , non-alcohol related.                                                                                                        | Table 2 in <sup>[21]</sup>                                                         |
| <b>CC+ to HCC</b>                                             | 3%                                                                              | Probability of developing hepatoma from compensated cirrhosis: 0.03 (0.007-0.05)                                                                                                                                                                                                                                                   | <sup>[16]</sup> , calculated from <sup>[22-24]</sup>                               |
| <b>NMD+/SLD+ to death</b>                                     | Probability dependent on age                                                    | - Mortality data for general population (life tables assuming percentage of males and initial age as in feasibility study <sup>[7]</sup><br>- Excess mortality due to diabetes (diabetes-related death rate of 1.4%, from 10-year follow-up in UKPDS study) assumed to be as in 4a above (for NMD- to death and for SLD- to death) | ONS (life tables), feasibility study <sup>[7]</sup> , UKPDS <sup>[20]</sup>        |
| <b>CC+ to death</b>                                           | CCI->death: 7.5%;<br>CCII->death: 6.6%                                          | Probability of proceeding to death directly for patients with compensated cirrhosis, during the 1 <sup>st</sup> year after diagnosis, non-alcohol related cirrhosis                                                                                                                                                                | Table 2 in <sup>[21]</sup>                                                         |
| <b>2.4c. Annual probabilities for end stage liver disease</b> |                                                                                 |                                                                                                                                                                                                                                                                                                                                    |                                                                                    |
| Transition                                                    | Annual probability                                                              | Data used to calculate probability                                                                                                                                                                                                                                                                                                 | Source                                                                             |
| <b>DC to HCC</b>                                              | 3%                                                                              | Probability of developing hepatoma from decompensated cirrhosis as in <sup>[16]</sup> – 0.03 (range: 0.007-0.05)                                                                                                                                                                                                                   | <sup>[16]</sup> , based on <sup>[24]</sup> <sup>[23]</sup> <sup>[22, 25]</sup>     |

|                            |                                                                                                                                                                       |                                                                                                                                                                                                                                  |                                            |
|----------------------------|-----------------------------------------------------------------------------------------------------------------------------------------------------------------------|----------------------------------------------------------------------------------------------------------------------------------------------------------------------------------------------------------------------------------|--------------------------------------------|
|                            |                                                                                                                                                                       |                                                                                                                                                                                                                                  |                                            |
| <b>DC to transplant</b>    | Age < 70: 5%,<br>age ≥ 70: 0%                                                                                                                                         | Probability of liver transplant for decompensated cirrhosis as in <sup>[16]</sup> - 0.05 (range: 0.05-0.25)                                                                                                                      | <sup>[16]</sup> , based on <sup>[26]</sup> |
| <b>DC to death</b>         | DCIII ->death: 25.1%;<br>DCIV -> death: 20.4%                                                                                                                         | Probability of proceeding to death directly for patients with decompensated cirrhosis, detail numbers by Baveno stages: non-alcohol related disease, Table 2 and 3 <sup>[21]</sup> , in the 1 <sup>st</sup> year after diagnosis | <sup>[21]</sup>                            |
| <b>HCC to transplant</b>   | Age < 65: 4%,<br>age ≥ 65: 0%                                                                                                                                         | Annual probability of liver transplant for HCC patients in the two age groups <sup>[27]</sup>                                                                                                                                    | <sup>[27]</sup>                            |
| <b>HCC to death</b>        | 53.0% - 1 <sup>st</sup> year,<br>25.5% - 2 <sup>nd</sup> year,<br>17.2% - 3 <sup>rd</sup> year,<br>16.7% - 4 <sup>th</sup> year<br>13.3% - after 4 <sup>th</sup> year | Calculation based on data from the US registries: the 1-, 2-, 3-, 4- and 5-year survival rates for the cohorts diagnosed in 1997-2004 years, as in Table 3 in <sup>[28]</sup>                                                    | <sup>[28]</sup>                            |
| <b>Transplant to death</b> | 16.6% - 1 <sup>st</sup> year<br>3.1% - 2 <sup>nd</sup> and 3 <sup>rd</sup> year<br>2.9% - after 3 <sup>rd</sup> year                                                  | Calculation based on the data published in the meta-analysis of 9 studies, Figure 2 <sup>[29]</sup> , NASH group: 598/717 (1-year patient survival), 468/598 (3-year survival), 461/625 (5-year survival).                       | <sup>[29]</sup>                            |

\*Where I, II, III, IV refer to the four Baveno stages of cirrhosis

## Appendix 3. Utilities

In this appendix, the review concerning primary studies on QoL, useful to obtain utility score, is summarized. The focus here is on the studies employing EQ-5D tool to measure QoL, transferable to utility values in the UK setting.

To ensure consistency, the health utility values for decompensated cirrhosis, HCC and liver transplant have all been used from Chong *et al* which was based on a Canadian population and has clear inputs into a probabilistic sensitivity analysis. It has been assumed that the decrement in QoL associated with chronic liver disease is similar regardless of the underlying aetiology; the same assumption was made in the cost-utility analysis by Mahady *et al* which focused on the NAFLD population<sup>[16]</sup>. Chong *et al* has also been used in economic evaluations for HCV-related chronic liver disease<sup>[30, 31]</sup>, and for non-HCV cirrhosis<sup>[32]</sup>.

Since the diagnosis of compensated cirrhosis results in further investigations to look for complications, with the possibility of subsequent preventative treatment, a utility decrement was included for compensated cirrhosis once it is diagnosed (CC+). The utility score is assumed to be equal to the difference between the health-related QoL estimates used for the two health states of 'compensated cirrhosis' and 'remaining well with advanced fibrosis (Fibrosis stages 3/4)', in the cost-utility analysis by Mahady *et al*.<sup>[16]</sup>

The following table provides the summary of utility scores in the primary studies identified, indicating cost-effectiveness analyses using particular studies.

**Supplementary Table 3.1: Summary of utility values for liver disease\***

| S<br>t<br>u<br>d<br>y | Country                               | Tool  | Population                                                                                                     | Value               | CC+/C<br>C-                 | DC (DC)                 | HCC                     | LT                      | PLT<br>(3m) | PLT<br>(6m) | PLT<br>(1y) | PLT<br>(2y)                 | CE<br>As                |
|-----------------------|---------------------------------------|-------|----------------------------------------------------------------------------------------------------------------|---------------------|-----------------------------|-------------------------|-------------------------|-------------------------|-------------|-------------|-------------|-----------------------------|-------------------------|
| <sup>[33]</sup>       | UK                                    | EQ-5D | Liver Transplantation:<br>Total respondents (455),<br>LT(408), PLT(48),Died before<br>LT(23),Died after LT(58) | Mean                |                             |                         |                         |                         | 0.64        | 0.69        | 0.71        | 0.73                        | <sup>[32]</sup>         |
| <sup>[34]</sup>       | Belgium                               | EQ-5D | CHB patients<br>Total 421 , CHB 127, CC 69, DC<br>2, HCC 10, PLT 60, ICAR 153                                  | Mean<br>(95%<br>CI) | 0.78<br>(0.73<br>-<br>0.84) | 0.70<br>(0.17-1)        | 0.67<br>(0.44-<br>0.90) |                         |             |             |             | 0.82<br>(0.75-<br>0.88<br>) | <sup>[35]</sup>         |
| <sup>[36]</sup>       | Italy                                 | EQ-5D | Population (%): HCV(31.8),<br>HBV(20.3), Other hep (7.8)<br>,Cirrhosis(20.4),LT(11.9),<br>HCC(7.8)             | Mean<br>(SE)        | 0.73<br>(0.27<br>8)         |                         | 0.757<br>(0.327)        | 0.767<br>(0.256<br>)    |             |             |             |                             |                         |
| <sup>[37]</sup>       | UK                                    | EQ-5D | HCV<br>population(N): Mild<br>HCV(185),Moderate<br>HCV(71),Cirrhotic(40)                                       | Mean                | 0.55                        | 0.45                    | 0.45                    |                         |             |             |             |                             | <sup>[38]</sup>         |
| <sup>[39]</sup>       | Canada                                | EQ-5D | HCV population(%): No biopsy<br>(18),<br>MMHCV(23),CC(12),DC(5),HC<br>C(8),LT(16), SVR<br>monotherapy(19)      | Mean<br>(95%<br>CI) | 0.74<br>(0.66<br>-<br>0.83) | 0.66<br>(0.46-<br>0.86) | 0.65<br>(0.44-<br>0.86) | 0.69<br>(0.62-<br>0.77) |             |             |             |                             | <sup>[30-<br/>32]</sup> |
| <sup>[40]</sup>       | Several<br>(reportin<br>g UK<br>only) | SG    | CHB, UK population                                                                                             | Mean                | 0.66                        | 0.37                    | 0.43                    | 0.57                    |             |             |             | 0.64                        | <sup>[35]</sup>         |

| <b>S<br/>t<br/>u<br/>d<br/>y</b> | <b>Country</b> | <b>Tool</b> | <b>Population</b>                           | <b>Value</b>  | <b>CC+/C<br/>C-</b> | <b>DC (DC)</b>   | <b>HCC</b>       | <b>LT</b>     | <b>PLT<br/>(3m)</b> | <b>PLT<br/>(6m)</b> | <b>PLT<br/>(1y)</b> | <b>PLT<br/>(2y)</b> | <b>CE<br/>As</b> |
|----------------------------------|----------------|-------------|---------------------------------------------|---------------|---------------------|------------------|------------------|---------------|---------------------|---------------------|---------------------|---------------------|------------------|
| <sup>[41]</sup>                  | UK             | EQ-5D       | Population(N) : PBC(122), ALD(155), PSC(70) | Mean (95% CI) |                     | 0.49 (SE=0.056)* | 0.49 (SE=0.056)* | 0.51 (0.053)* | 0.52 (0.061)*^      | ^                   | ^                   | ^                   | <sup>[38]</sup>  |

\*No values were reported for NMD – no/mild liver disease or SLD – significant liver disease.

CC – compensated cirrhosis; DC – decompensated cirrhosis; LT – liver transplant; PLT – post liver transplant; CHB - chronic hepatitis B

MMHCV – mild/moderate HCV; PBC - primary biliary cirrhosis; ALD - alcoholic liver disease; PSC – primary sclerosing cholangitis; SVR - sustained virological response; ICAR - ‘inactive carrier’ [of virus]. \*Values reported in <sup>[38]</sup> obtained from <sup>[41]</sup> study. ^ Presented in Graph (Figure 2)

## Appendix 4. Resource use and costs

Differences in resource consumption from implementation of RSP compared with SC may occur due to:

- The RSP intervention;
- Patients being diagnosed with significant liver disease or compensated cirrhosis (SLD+/CC+) at an earlier stage when interventions (lifestyle modifications +/- treatment) may reduce the progression of liver disease to more costly health states;
- Positively identifying those patients who are at risk of liver disease (NMD+) and increasing awareness of how lifestyle modifications can reduce the probability of developing significant liver disease and thus reducing the progression of liver disease to more costly health states;
- The reduction in referrals to secondary care and subsequent diagnostic tests for those patients stratified to be at low risk for chronic liver disease (NMD+) in the RSP

### Resource use data

For the patients who are identified/ detected the costs for the NMD+/SLD+/CC+ health states differ between the RSP and SC arms due to the specific diagnostic investigations and therapeutic interventions which occur within each health state. E.g. Patients stratified to have no/mild liver disease (NMD+) in the RSP would not require a referral to secondary care for further investigations compared with the same patients in the SC arm who may still require a referral and further investigations before the same diagnosis could be obtained. It is also assumed that patients who are unidentified/undetected (NMD-/SLD-/CC-) accrue no extra costs in either of the RSP or SC arms.

Resource use for each health state was derived from evidence based practice. This includes evidence from the scientific literature along with local and national guidelines in the UK and clinical practice guidelines from EASL (European Association for the Study of the Liver) and AASLD (American Association for the Study of Liver Disease). Where limited evidence was identified within specific health states, expert opinion was sought from a panel of regional liver specialists which has been previously described.

In two cases there was disagreement between cost or resource use estimates derived from the literature and that reported by the members of the expert panel and local finance departments. In such cases, a range was used for the cost or resource use with the lower and upper bounds represented by the two estimates:

1) OGD: The cost was estimated to be £277 based on NHS reference costs (HRG-4 code HRG FZ60Z). A local cost derived from an audit<sup>[7]</sup> estimated the cost to be £416. Due to the large difference in estimates, a range of £277-416 was used for this cost item.

2) There was uncertainty regarding the level of resource used associated with certain conditions, in particular, the number of inpatient admissions in DC and the number of outpatient visits in DC and HCC. A range was constructed for each resource use item based on the evidence from a previous costing study of liver cirrhosis and information obtained from the expert panel (a detailed breakdown of resource use in DC is found in Tables 4.2-4.5).

The resource use across the model states are described in the following subsections.

### *Resource use data for NMD*

In the RSP arm, patients within this health state have been stratified to have no/mild liver fibrosis following the result of their fibroscan in primary care. Subsequently, patients diagnosed with NAFLD were assumed to be referred to a dietician and commenced on pioglitazone while ALD patients were referred for brief alcohol intervention. A referral to secondary care is not required and ongoing management of these patients can be completed by the GP. If patients remained in NMD in subsequent years, they had a fibroscan repeated every 3 years and an annual appointment with their GP. NAFLD patients were assumed to have a yearly appointment with a dietician and continued treatment with pioglitazone. Two thirds of ALD patients were assumed to require repeated psychological intervention<sup>[42]</sup> following failure of the intervention in the first year.

In the SC arm patients were identified by their GP following persistently abnormal LFTs and subsequently referred to secondary care for further investigations which constitutes a full liver screen (LFT, Hepatitis B/C and autoimmune serology) an ultrasound scan, a fibroscan and a liver biopsy. Following a histological diagnosis of no/ mild liver fibrosis patients were assumed to receive the same interventions as those patients in the RSP arm depending on the underlying aetiology of their liver disease. If patients remained in NMD in subsequent years they were seen yearly by the GP and the NAFLD patients continued with pioglitazone.

### *Resource use data for SLD*

Patients stratified to have significant liver disease in the RSP arm by the result of their fibroscan in primary care were referred for further investigations in secondary care. This included a full liver screen, an ultrasound scan and a liver biopsy. Patients diagnosed with NAFLD were assumed to be referred to a dietician and commenced on pioglitazone while ALD patients were referred for brief alcohol intervention and commenced on acamprosate. If patients in the RSP arm remained in SLD in subsequent years it was assumed they would continue to have the same resource use apart from the initial diagnostic investigations. Again two thirds of ALD patients would require repeated psychological intervention.

In the SC arm the resource use in the first year and the subsequent years was assumed to be the same as the RSP arm although the patients would have initially been identified by their GP following persistently abnormal LFTs and only received their diagnosis following a referral to secondary care. Thus the only difference in resource use is an additional LFT.

### *Resource use data for CC*

Patients stratified to have compensated cirrhosis in the RSP arm following their fibroscan in primary care, were referred to secondary care for further diagnostic investigations and enrolled into surveillance pathways. Thus, along with having a full liver screen, an ultrasound scan and a liver biopsy to confirm the diagnosis these patients would also have had an OGD for variceal surveillance and a repeat abdominal ultrasound and alpha fetoprotein every 6 months for HCC surveillance. Patients identified to have varices were prescribed carvedilol as primary prophylaxis for variceal bleeding. Again, patients diagnosed with NAFLD were also assumed to be referred to a dietician while patients with ALD were referred for a brief alcohol intervention.

If patients in the RSP arm remained in CC in subsequent years they would continue to have a six monthly follow-up in secondary care along with an abdominal ultrasound scan and an alpha fetoprotein for HCC surveillance. For their variceal surveillance they would only require an OGD every 2 years. As in the previous health states patients



diagnosed with NAFLD are assumed to have a yearly appointment with a dietician while two thirds of patients with ALD are referred for repeated psychological intervention.

In the SC arm, resource use in CC was assumed to be the same as the RSP arm in the first and subsequent years although patients would have initially been identified differently and only received their diagnosis following further diagnostic investigations in secondary care.

#### *Resource use data for DC*

In the DC health state, the resource use in RSP and SC arms was assumed not to differ. However, there were large differences in the services used according to the decompensating event which occurred; patients were assumed to present with ascites, a variceal bleed or encephalopathy. The cost for this health state was weighted based on the proportion of patients presenting with each decompensating event as identified in d'Amico et al<sup>[43]</sup>. In this study 51.6% of patients decompensated with ascites as their initial presentation, while 22.8% presented with a variceal bleed and 25.5% presented with encephalopathy. For patients presenting with a subsequent event the proportions were slightly different; 52.4% presented with ascites, 18.8% with a variceal bleed, and 28.8% with encephalopathy. The former was used in the cost for the first year and the latter for the subsequent years spent in this health state. Due to uncertainty in certain cost categories, ranges were constructed using expert opinion and estimates from Bennett et al.<sup>[44]</sup>.

Irrespective of which decompensating event the patient presented with all patients within this health state continued to have variceal and HCC surveillance and thus required an OGD every two years along with a six monthly alpha fetoprotein and abdominal ultrasound. NAFLD patients were assumed to have an annual appointment with a dietician while ALD patients were referred for brief alcohol intervention, as in NMD-CC.

As previously discussed, there was uncertainty regarding the number of inpatient admissions for each decompensating event along with the number of outpatient visits that would be required. Therefore, in agreement with the expert panel, a range was constructed for patients presenting with ascites or a variceal bleed as an emergency or planned admission. For those patients who presented with a variceal bleed a further resource was included to account for the additional OGDs that would be required to complete endoscopic variceal band ligation. Each decompensating event was treated with medications as detailed in Table 4.8.

For patients who remained within DC the resource use in subsequent years remained the same apart from those patients with ascites who instead of having a planned admission would be reviewed in the medical day case unit for paracentesis of their ascites.

#### *Resource use data for HCC*

As in the DC health state, the resource use for the treatment of HCC was assumed to be the same for both the RSP and SC arms. The resource use varied according to the different treatment strategies and subsequently the cost was weighted according to the proportion of patients undergoing each treatment identified from the study by Schutte et al<sup>[45]</sup>. In this study 17.7% of patients underwent surgical resection, 6.9% had radiofrequency ablation (RFA), 32.7% had transarterial chemoembolisation (TACE) and 42.7% were prescribed sorafenib; a systemic therapy for patients who are not suitable for surgery or locoregional therapies. The yearly cost of sorafenib was calculated based on the daily dosage used by the panel of experts along with the preparation and cost information from the British National Formulary<sup>[46]</sup>. For patients undergoing a liver resection an initial hospital admission and a planned follow up

admission were assumed to be required along with a repeat resection in 17.1% of patients who would be identified to have tumour recurrence <sup>[47]</sup>. Patients undergoing TACE or RFA had a hospital day case admission for the procedure and a planned day case admission at follow-up. In agreement with the expert panel it was agreed that all patients would have three follow-up telephone consultations with a specialist nurse along with 4-7 hospital outpatient visits.

For subsequent years in both arms of the model the resource use remained the same excluding the initial resource use and costs of the different treatment options which would only have been undertaken during the first year following diagnosis.

#### *Resource use data for transplant*

The cost of the first year in the liver transplant health state was based on the only published study reporting the cost of transplant and follow-up care in a UK health setting <sup>[48]</sup> and is assumed to be the same for both arms of the model. The cost estimate from this study included the pre-transplant work up, the inpatient admission for the procedure and subsequent follow up care inclusive of immunosuppressive regimes to prevent organ rejection. Thus the final cost included all care received in the 27 months from when the patient was listed for a liver transplant.

Ouwens et al <sup>[49]</sup> was the only study identified by the investigators which explicitly reported the annual cost following a liver transplant in year 2 onwards and thus was used as the estimate for the subsequent years spent in the liver transplant state. The cost for the first year was estimated by subtracting the cost of Ouwens et al from the total cost of Longworth et al which as previously discussed was based on a time period of 27 months. The other studies selected by the investigators were assessed with the cost estimates converted to 2014 GBP and subsequently used to construct a range for this health state. The characteristics of the studies and cost estimates in 2014 GBP are listed in Tables 4.6-4.7.

#### **Source of unit costs**

Most of the unit costs used to populate the pathway model are derived from NHS reference costs, PSSRU and NHS pay scales <sup>[50, 51]</sup>. Where a cost could not be identified through UK-based published unit cost scales, a search of the literature was conducted or local finance departments were queried to obtain the unit cost. All costs are inflated to the 2013/14 financial year using the Department of Health hospital & community health services (HCHS) index <sup>[51]</sup>. For certain categories, multiple possible unit costs are available. In such cases, the minimum and maximum costs are listed. Unit costs are summarized in Table 4.8.

#### *Primary care*

The unit cost of GP and nurse consultation are sourced from PSSRU 2014 and time assumptions from the GP workload survey 2007 <sup>[51, 52]</sup>.

#### *Secondary care*

The unit costs of hospital services are derived from NHS reference costs 2013/14 <sup>[50]</sup>. Cost of admitted care is derived from the mean cost of admission (assumed min. length of stay 1 night) and varies across emergency and planned care. Outpatient visits are assumed to involve a consultant.

### Laboratory costs

The costs of laboratory tests and diagnostic scans are derived from published studies of liver disease, published sources of unit costs for the UK NHS and local costs quoted by the finance department. The cost of a fibroscan is derived from the York Health Economics evaluation of ultrasound elastography in the diagnosis of liver fibrosis<sup>[53]</sup>. The cost of a fibroscan includes the cost of an appointment with a Band 7 nurse in addition to maintenance cost of equipment. The cost of an ultrasound, a liver biopsy and an OGD are derived from NHS reference costs<sup>[50]</sup>. The local cost of an OGD was found to be substantially higher than the national average (£416 vs. £276.93); both are included to form a confidence interval. Unit costs of LFTs, alpha fetoprotein and autoimmune liver screen are derived from UK-based published studies.<sup>[32, 54]</sup>

### Medications

Cost of medications is derived from the BNF<sup>[46]</sup>. The cost of medications used in a 12 month period was derived using information on daily dose, pack size and cost per pack. Details in Table 4.9.

### Other services

Patients identified to be at risk or diagnosed with significant liver disease (both in RSP and SC) are assumed to be referred to additional services in the form of a dietician appointment (NAFLD).

**Supplementary Table 4.1: Summary of unit costs across healthcare sector**

| Type           | Resource use                 | Diagnosis                           | Unit cost | Notes                                                                                          | Unit cost source                            |
|----------------|------------------------------|-------------------------------------|-----------|------------------------------------------------------------------------------------------------|---------------------------------------------|
| Primary care   | GP clinic visit              |                                     | 46        | Based on patient contact of 11.7 minutes                                                       | [51]                                        |
| Secondary care | Nurse telephone consultation |                                     | 8.40      | Based on consultation length of 6 mins, band 5 NHS staff earnings estimate for qualified nurse | [51]                                        |
|                | emergency admission          | Liver cirrhosis                     | 1685.99   | Based on elective admission, HRG GC17K                                                         | NHS reference costs 2013/14 <sup>[50]</sup> |
|                | emergency admission          | Ascites                             | 1484.31   | Based on elective admission, HRG FZ91M                                                         | [50]                                        |
|                | emergency admission          | Oesophageal varices with bleeding   | 1317.1    | Based on elective admission, HRG FZ38P                                                         | [50]                                        |
|                | emergency admission          | HCC                                 | 1842.42   | Based on elective admission, HRG GC12K                                                         | [50]                                        |
|                | emergency admission          | Encephalopathy                      | 2379.99   | Based on non-elective admission, HRG AA22G                                                     | [50]                                        |
|                | outpatient visit             | Liver fibrosis, cirrhosis, ascites, | 217.30    | Based on consultant-led                                                                        | [50]                                        |

| Type  | Resource use         | Diagnosis                                                            | Unit cost | Notes                                                                                           | Unit cost source                                                                                         |
|-------|----------------------|----------------------------------------------------------------------|-----------|-------------------------------------------------------------------------------------------------|----------------------------------------------------------------------------------------------------------|
|       |                      | varices or HCC – first visit                                         |           | outpatient visit, TFC 306                                                                       |                                                                                                          |
|       | outpatient visit     | Liver fibrosis, cirrhosis, ascites, varices or HCC – follow-up visit | 175.72    | Based on consultant-led outpatient visit, TFC 306                                               | [50]                                                                                                     |
|       | Planned admission    | Ascites                                                              | 1070.26   | Based on elective admission, HRG FZ91M                                                          | [50]                                                                                                     |
|       | Planned admission    | Oesophageal varices with bleeding                                    | 901.32    | Based on elective admission, HRG FZ38P                                                          | [50]                                                                                                     |
|       | Planned admission    | Liver cirrhosis                                                      | 1061.54   | Based on elective admission, HRG GC17K                                                          | [50]                                                                                                     |
|       | Planned admission    | HCC resection                                                        | 5362.01   | Based on elective admission, HRG GA06D                                                          | [50]                                                                                                     |
|       | Planned admission    | HCC follow-up                                                        | 1535.32   | Based on elective admission, HRG GC12K                                                          | [50]                                                                                                     |
|       | Transplant           | First year cost                                                      | 89282     | Based on Longworth et al - cost of first 12 months, inflated to 2014 prices                     | [48]                                                                                                     |
|       | Transplant           | Subsequent years cost                                                | 17077     | Based on Ouwers et al - cost in subsequent years, converted to GBP and inflated to 2014 prices  | [49]                                                                                                     |
|       | Day case             | Day case chemoembolisation (TACE)                                    | 639.53    | Based on day case cost, HRG GC12F                                                               | [50]                                                                                                     |
|       | Day case             | HCC follow-up                                                        | 359.98    | Based on day case, HRG GC12K                                                                    | [50]                                                                                                     |
|       | Day case             | Ascites                                                              | 400.15    | Based on ascites, HRG FZ91M                                                                     | [50]                                                                                                     |
|       | TIPS stent           | Variceal bleed                                                       | 3930      | Based on local cost                                                                             | Harman et al - Economic modelling of early TIPS insertion for acute variceal haemorrhage <sup>[55]</sup> |
| Tests | OGD (lower estimate) |                                                                      | 276.93    | Based on outpatient visit, HRG FZ60Z                                                            | [50]                                                                                                     |
|       | OGD (upper estimate) |                                                                      | 416       | Local cost estimate                                                                             | Harman et al - Economic modelling of early TIPS insertion for acute variceal haemorrhage <sup>[55]</sup> |
|       | Fibroscan            |                                                                      | 37.30     | York HE Consortium: An Economic Evaluation of Ultrasound Elastography in the Diagnosis of Liver |                                                                                                          |

| Type | Resource use            | Diagnosis | Unit cost | Notes                                                    | Unit cost source                                                        |
|------|-------------------------|-----------|-----------|----------------------------------------------------------|-------------------------------------------------------------------------|
|      |                         |           |           | Fibrosis <sup>[53]</sup>                                 |                                                                         |
|      | Hep B/C scan            |           | 30        | Local cost estimate                                      | Cost of HCV and HBV combined serology quoted by QMC virology department |
|      | liver biopsy            |           | 546.02    | Based on day cost procedure, HRG CZ36Y, inflated to 2014 | <sup>[50]</sup>                                                         |
|      | Liver function test     |           | 4.52      | <sup>[54]</sup> , average across 3 sites                 |                                                                         |
|      | ultrasound              |           | 49.35     | Based on outpatient visit, HRG RA23Z                     | <sup>[50]</sup>                                                         |
|      | alpha fetoprotein       |           | 4.52      | <sup>[32]</sup>                                          |                                                                         |
|      | Autoimmune liver screen |           | 13        | Wright et al (2006), average across 3 sites              |                                                                         |
|      | Dietician appointment   |           | 80        | Dietician outpatient visit                               | <sup>[50]</sup>                                                         |
|      | Hospital transport      |           | 231       | Based on NHS ref cost: ambulance service code ASS02      | <sup>[50]</sup>                                                         |

**Supplementary Table 4.2: Breakdown of resource use and cost across model states in RSP, first year**

| State                                        | Type           | Service                     | Units | Min cost (£)   | Max cost (£)   | Source             |
|----------------------------------------------|----------------|-----------------------------|-------|----------------|----------------|--------------------|
| NMD                                          | Tests          | Fibroscan                   | 1     | 37.31          | 37.31          | <sup>[7, 56]</sup> |
|                                              | Primary care   | GP appointment              | 1     | 46.00          | 46.00          | <sup>[7]</sup>     |
|                                              |                | Dietician appointment       | 1     | 80.00          | 80.00          | <sup>[57]</sup>    |
|                                              | Medication     | Glitazone                   |       | 19.44          | 19.44          | <sup>[57]</sup>    |
| <b>Annual cost per patient for NMD state</b> |                |                             |       | <b>182.75</b>  | <b>182.75</b>  |                    |
| SLD                                          | Tests          | Liver function test         | 1     | 4.52           | 4.52           | <sup>[58]</sup>    |
|                                              |                | Fibroscan                   | 1     | 37.31          | 37.31          | <sup>[7, 56]</sup> |
|                                              |                | Hep B/C serology            | 1     | 30.00          | 30.00          | <sup>[58]</sup>    |
|                                              |                | Ultrasound                  | 1     | 49.35          | 49.35          | <sup>[58]</sup>    |
|                                              |                | Liver biopsy                | 1     | 546.02         | 546.02         | <sup>[59]</sup>    |
|                                              |                | Autoimmune liver screen     | 1     | 13.00          | 13.00          | <sup>[58]</sup>    |
|                                              | Primary care   | GP appointment              | 1     | 46.00          | 46.00          | <sup>[58]</sup>    |
|                                              | Secondary care | Consultant outpatient visit | 2     | 393.02         | 393.02         | <sup>[58]</sup>    |
|                                              | Other services | Dietician appointment       | 1     | 80.00          | 80.00          | <sup>[57]</sup>    |
|                                              | Medication†    | Glitazone                   |       | 19.44          | 19.44          | <sup>[57]</sup>    |
| <b>Annual cost per patient for SLD state</b> |                |                             |       | <b>1218.65</b> | <b>1218.65</b> |                    |
| CC                                           | Tests          | OGD++                       | 1     | 276.93         | 416            | <sup>[60]</sup>    |
|                                              |                | Fibroscan                   | 1     | 37.31          | 37.31          | <sup>[7, 56]</sup> |
|                                              |                | LFT                         | 1     | 4.52           | 4.52           | <sup>[58]</sup>    |
|                                              |                | Hep B/C serology            | 1     | 30.00          | 30.00          | <sup>[58]</sup>    |

| State                                   | Type           | Service                                                            | Units                 | Min cost (£)    | Max cost (£) | Source           |
|-----------------------------------------|----------------|--------------------------------------------------------------------|-----------------------|-----------------|--------------|------------------|
|                                         |                | Liver biopsy                                                       | 1                     | 546.02          | 546.02       | [59]             |
|                                         |                | Ultrasound for HCC                                                 | 2                     | 98.70           | 98.70        | [61]             |
|                                         |                | Alpha fetoprotein                                                  | 2                     | 9.04            | 9.04         | [61]             |
|                                         |                | Autoimmune liver screen                                            | 1                     | 13.00           | 13.00        | [58]             |
|                                         | Primary care   | GP appointment                                                     | 1                     | 46.00           | 46.00        | [58]             |
|                                         | Secondary care | Outpatient visits                                                  | 2                     | 393.02          | 393.02       | [58]             |
|                                         | Other services | Dietician appointment                                              | 1                     | 80.00           | 80.00        | [57]             |
|                                         | Medications‡   |                                                                    |                       | 116.92          | 116.92       | [57, 60, 62, 63] |
| Annual cost per patient for CC state    |                |                                                                    |                       | 1651.46         | 1790.53      |                  |
| DC                                      | Tests          | OGD††                                                              | 1                     | 276.93          | 416          | [60]             |
|                                         |                | Additional OGD for variceal bleed††                                | 4                     | 1107.72         | 1664         | [60]             |
|                                         |                | Ultrasound                                                         | 2                     | 98.70           | 98.70        | [61]             |
|                                         |                | Alpha fetoprotein                                                  | 2                     | 9.04            | 9.04         | [61]             |
|                                         | Primary care   | GP appointments                                                    | 4                     | 184.00          | 184.00       | a                |
|                                         | Secondary care | Emergency admission if ascites                                     | 1-3                   | 1484.31         | 4452.93      | [64],a           |
|                                         |                | Emergency admission of variceal bleed                              | 1-3                   | 1317.10         | 3951.30      | [60],a           |
|                                         |                | Emergency admission - encephalopathy                               | 1-3                   | 2379.99         | 7139.97      | [65],a           |
|                                         |                | Planned admission, ascites                                         | 0-1                   | 0               | 1070.26      | [44, 64]         |
|                                         |                | Planned admission, variceal bleed                                  | 0-1                   | 0               | 901.32       | [44],a           |
|                                         |                | Outpatient visits, ascites variceal bleeds or encephalopathy       | 3-6                   | 568.74          | 1095.90      | [44],a           |
|                                         |                | TIPS stent – in 13% of patients with variceal bleed                | 1                     | 3930            | 3930         | [55, 60]         |
|                                         |                | Other services                                                     | Dietician appointment | 1               | 80.00        | 80.00            |
|                                         | Medications‡   | NAFLD ascites                                                      |                       | 115.05          | 115.05       | [64]             |
|                                         |                | NAFLD variceal bleeding                                            |                       | 20.09           | 20.09        | [60]             |
|                                         |                | NAFLD encephalopathy                                               |                       | 3508.67         | 3508.67      | [66]             |
|                                         |                |                                                                    |                       |                 |              |                  |
| Annual cost per patient for DC state*   |                |                                                                    |                       | 4221.30         | 9122.52      |                  |
| HCC                                     | Secondary care | Nurse telephone consultations                                      | 3                     | 25.20           | 25.20        | a                |
|                                         |                | Hospital admission HCC resection                                   | 1                     | 5362.01         | 5362.01      | [44, 61, 67]     |
|                                         |                | Hospital admission – follow-up                                     | 1                     | 1535.32         | 1535.32      | [44], a          |
|                                         |                | Day case chemoembolisation (TACE) or radiofrequency ablation (RFA) | 1                     | 639.53          | 639.53       | [44, 61, 67]     |
|                                         |                | Day case follow-up                                                 | 1                     | 359.98          | 359.98       | [44],a           |
|                                         |                | Outpatient visits                                                  | 4-7                   | 744.46          | 1271.62      | [44]a            |
|                                         |                | Hospital admission - tumour recurrence (probability 17.1%)         | 1                     | 916.90          | 916.90       | [47]             |
|                                         | Medications    | Sorafenib                                                          |                       | 38879.17        | 38879.17     | [61]             |
| Annual cost per patient for HCC state** |                |                                                                    |                       | 19150.55        | 19677.76     |                  |
| Transplant                              | Secondary care | first year cost based on Longworth et                              | 1                     | 89282.20 (Range |              | [48, 49]         |

| State                                               | Type | Service                                                             | Units | Min cost (£)                                | Max cost (£) | Source |
|-----------------------------------------------------|------|---------------------------------------------------------------------|-------|---------------------------------------------|--------------|--------|
|                                                     |      | al, subtracting cost for 2 <sup>nd</sup> year based on Ouwens et al |       | 56300.60,                                   | 184574.29)†  |        |
| <b>Annual cost per patient for Transplant state</b> |      |                                                                     |       | <b>89282.20 (Range 56300.60, 184574.29)</b> |              |        |

a: expert opinion - panel of hepatologists (Dr Neil Guha, Prof Guru Aithal, Dr Martin James, Dr Stephen Ryder, Dr Toby Delahooke, Dr Emilie Wilkes, Dr Nick Taylor)

\* Based on d'Amico et al<sup>[68]</sup>: ascites 51.6%, bleeding 22.8%, encephalopathy 25.5%.

\*\* Based on proportion of patients in each treatment based on local audit data - surgical resection 17.7%; RFA 6.9%; TACE 32.7%; sorafenib 42.7%<sup>[45]</sup>

† Range of estimates derived from studies of the cost of the transplant and follow-up care in first year. Please refer to Table 8 for estimates and references.

‡ For breakdown of medications used and cost, please refer to Table 9

†† Interval based on cost of OGD: lower estimate £277 based on NHS reference costs, HRG-4 code FZ60Z; upper estimate based on local cost found in Harman et al<sup>[55]</sup> of £416.

**Supplementary Table 4.3: Breakdown of resource use and cost (£) across model states in model, RSP, subsequent years**

| State                            | Type           | Service                      | Units | Min cost      | Max cost      | Source              |
|----------------------------------|----------------|------------------------------|-------|---------------|---------------|---------------------|
| NMD                              | Tests          | Fibroscan (every3 years)     | 0.333 | 12.43         | 12.43         | <sup>[69]</sup>     |
|                                  | Primary care   | GP appointment               | 1     | 46.00         | 46.00         | a                   |
|                                  | Other services | Dietician appointment        | 1     | 80.00         | 80.00         | <sup>[57]</sup>     |
|                                  | Medication     | Glitazone                    |       | 19.44         | 19.44         | <sup>[57, 62]</sup> |
| <b>Annual cost for NMD state</b> |                |                              |       | <b>157.87</b> | <b>157.87</b> |                     |
| SLD                              | Tests          | Liver function test          | 1     | 4.52          | 4.52          | a                   |
|                                  |                | Fibroscan                    | 1     | 37.31         | 37.31         | a, <sup>[69]</sup>  |
|                                  | Primary care   | GP appointment               | 1     | 46.00         | 46.00         | a                   |
|                                  | Secondary care | Consultant outpatient visits | 1     | 175.72        | 175.72        | a                   |
|                                  | Other services | Dietician appointment        | 1     | 80.00         | 80.00         | <sup>[57]</sup>     |
|                                  | Medications‡   | Glitazone                    |       | 19.44         | 19.44         | <sup>[57, 62]</sup> |
| <b>Annual cost for SLD state</b> |                |                              |       | <b>362.99</b> | <b>362.99</b> |                     |
| CC                               | Tests          | OGD††                        | 0.5   | 138.47        | 208.00        | <sup>[60]</sup>     |
|                                  |                | Fibroscan                    | 1     | 37.31         | 37.31         | <sup>[69]</sup> , a |
|                                  |                | LFT                          | 2     | 9.04          | 9.04          | a                   |
|                                  |                | Ultrasound for HCC           | 2     | 98.70         | 98.70         | <sup>[61]</sup> , a |
|                                  |                | Alpha fetoprotein            | 2     | 9.04          | 9.04          | <sup>[61]</sup>     |
|                                  | Primary care   | GP appointment               | 1     | 46.00         | 46.00         | a                   |
|                                  | Secondary care | Outpatient visits            | 2     | 351.44        | 351.44        | a                   |
|                                  | Other services | Dietician appointment        | 1     | 80.00         | 80.00         | <sup>[57]</sup>     |
|                                  | Medication‡    |                              |       | 116.92        | 116.92        | <sup>[60, 70]</sup> |
| <b>Annual cost for CC</b>        |                |                              |       | <b>886.92</b> | <b>956.45</b> |                     |

| State                       | Type                                | Service                                                    | Units    | Min cost                            | Max cost | Source    |
|-----------------------------|-------------------------------------|------------------------------------------------------------|----------|-------------------------------------|----------|-----------|
| state                       |                                     |                                                            |          |                                     |          |           |
| DC                          | Tests                               | OGD††                                                      | 1        | 276.93                              | 416      | [60]      |
|                             |                                     | Additional OGD for variceal bleed††                        | 4        | 1107.72                             | 1664     | [60]      |
|                             |                                     | Ultrasound                                                 | 2        | 98.70                               | 98.70    | [61]      |
|                             |                                     | Alpha fetoprotein                                          | 2        | 9.04                                | 9.04     | [61]      |
|                             | Primary care                        | GP appointments                                            | 4        | 184.00                              | 184.00   | a         |
|                             | Secondary care                      | Emergency admission for ascites                            | 1-3      | 1484.31                             | 4452.93  | [64], a   |
|                             |                                     | Emergency admission of variceal bleed                      | 1-3      | 1317.10                             | 3951.30  | a, [60]   |
|                             |                                     | Emergency admission, encephalopathy                        | 1-3      | 2380.00                             | 7139.97  | [65], a   |
|                             |                                     | Day case, ascites                                          | 6        | 2400.90                             | 2400.90  | [44, 64]  |
|                             |                                     | planned admission, variceal bleeds                         | 0-1      | 0                                   | 901.32   | [44], a   |
|                             |                                     | Oupatient visits, ascites or variceal bleeds               | 3-6      | 527.16                              | 1054.32  | [44], a   |
|                             |                                     | TIPS stent – 13% of patients with variceal bleed           | 1        | 3930                                | 3930     | [55, 60]  |
|                             | Other services                      | Dietician appointment                                      | 1        | 80.00                               | 80.00    | [57]      |
|                             | Medications‡                        | NAFLD ascites                                              |          | 115.05                              | 115.05   | [64]      |
|                             |                                     | NAFLD variceal bleeding                                    |          | 20.09                               | 20.09    | [60]      |
|                             |                                     | NAFLD encephalopathy                                       |          | 3508.67                             | 3508.67  | [66]      |
| Annual cost for DC state*   |                                     |                                                            | 5524.99  | 9887.17                             |          |           |
| HCC                         | Secondary care                      | Nurse telephone consultations                              | 3        | 25.20                               | 25.20    | a [44], a |
|                             |                                     | Hospital admission – follow-up                             | 1        | 1535.32                             | 1535.32  | [44], a   |
|                             |                                     | Day case follow-up                                         | 1        | 359.98                              | 359.98   | [44], a   |
|                             |                                     | outpatient visits                                          | 4-7      | 702.88                              | 1230.04  | [44], a   |
|                             |                                     | Hospital admission - tumour recurrence (probability 17.1%) | 1        | 916.90                              | 916.90   | [47], a   |
|                             | Medications                         | Sorafenib                                                  |          | 38879.17                            | 38879.17 | [61]      |
| Annual cost for HCC state** |                                     |                                                            | 17908.99 | 18436.21                            |          |           |
| Transplant                  | Re-transplantation                  | Based on Longworth et al, probability 5%                   | 0.05     | 4464.11 (range 2815.03,9228.71)†    |          | [48]      |
|                             |                                     | OR subsequent care                                         | 0.95     | 16223.33 (range 12733.94,16223.33)† |          | [49]      |
|                             | Annual cost for transplant state*** |                                                            |          | 20687.44 (range 15548.97-25452.04)  |          |           |

a: expert opinion - panel of hepatologists (Dr Neil Guha, Prof Guru Aithal, Dr Martin James, Dr Stephen Ryder, Dr Toby Delahooke, Dr Emilie Wilkes, Dr Nick Taylor)

\* Based on d'Amico et al [68]: ascites 52.4%, bleeding 18.8%, encephalopathy 28.8%.



\*\* Based on proportion of patients in each treatment based on local audit data - surgical resection 17.7%; RFA 6.9%; TACE 32.7%; sorafenib 42.7%<sup>[45]</sup>

\*\*\* The mean cost for the transplant state in subsequent years was calculated based on probability of 5% of retransplantation in subsequent years after the first procedure<sup>[44]</sup>, in which case the cost for first year of transplant from Longworth et al<sup>[48]</sup> would be applied; in other cases (probability 95%) the follow-up year cost from Ouwens et al<sup>[49]</sup> would be applied.

† Range of estimates derived from studies of the cost of follow-up care in subsequent years. Please refer to Table 8 for estimates and references.

‡ For breakdown of medications used and cost, please refer to Table 9

†† Interval based on cost of OGD: lower estimate £277 based on NHS reference costs, HRG-4 code FZ60Z; upper estimate based on local cost found in Harman et al<sup>[55]</sup> of £416.

**Supplementary Table 4.4: Breakdown of resource use and cost (£) across model states, standard care, first year**

| State                            | Type           | Service                     | Units | Min cost       | Max cost       | Source   |
|----------------------------------|----------------|-----------------------------|-------|----------------|----------------|----------|
| NMD                              | Tests          | Fibroscan                   | 1     | 37.31          | 37.31          | [57, 69] |
|                                  |                | LFT                         | 2     | 9.04           | 9.04           | [58]     |
|                                  |                | Hep B/C serology            | 1     | 30.00          | 30.00          | [58]     |
|                                  |                | Autoimmune liver screen     | 1     | 13.00          | 13.00          | [58]     |
|                                  |                | Ultrasound                  | 1     | 49.35          | 49.35          | [58]     |
|                                  |                | Liver biopsy                | 1     | 546.02         | 546.02         | [59]     |
|                                  | Primary care   | GP appointment              | 1     | 46.00          | 46.00          | [58]     |
|                                  | Secondary care | Consultant outpatient visit | 2     | 393.02         | 393.02         | [58]     |
|                                  | Other services | Dietician services          | 1     | 80.00          | 80.00          | [57]     |
|                                  | Medications    | Glitazone                   |       | 19.44          | 19.44          | a, [57]  |
| <b>Annual cost for NMD state</b> |                |                             |       | <b>1223.18</b> | <b>1223.18</b> |          |
| SLD                              | Tests          | Liver function test         | 2     | 9.04           | 9.04           | [58]     |
|                                  |                | Fibroscan                   | 1     | 37.31          | 37.31          | [69]     |
|                                  |                | Hep B/C serology            | 1     | 30.00          | 30.00          | [58]     |
|                                  |                | Ultrasound                  | 1     | 49.35          | 49.35          | [58]     |
|                                  |                | Liver biopsy                | 1     | 546.02         | 546.02         | [59]     |
|                                  |                | Autoimmune liver screen     | 1     | 13.00          | 13.00          | [58]     |
|                                  | Primary care   | GP appointment              | 1     | 46.00          | 46.00          | [58]     |
|                                  | Secondary care | Consultant outpatient visit | 2     | 393.02         | 393.02         | [58]     |
|                                  | Other services | Dietician appointment       | 1     | 80.00          | 80.00          | [57]     |
|                                  | Medications‡   | Glitazone                   |       | 19.44          | 19.44          | [57]     |
| <b>Annual cost for SLD state</b> |                |                             |       | <b>1223.18</b> | <b>1223.18</b> |          |
| CC                               | Tests          | OGD                         | 1     | 276.93         | 416            | [60]     |
|                                  |                | Fibroscan                   | 1     | 37.31          | 37.31          | [69]     |
|                                  |                | LFT                         | 2     | 9.04           | 9.04           | [58]     |
|                                  |                | Hep B/C serology            | 1     | 30.00          | 30.00          | [58]     |
|                                  |                | Liver biopsy                | 1     | 546.02         | 546.02         | [59]     |
|                                  |                | Ultrasound for HCC          | 2     | 98.70          | 98.70          | [61]     |
|                                  |                | Alpha fetoprotein           | 2     | 9.04           | 9.04           | [61]     |
|                                  |                | Autoimmune liver screen     | 1     | 13.00          | 13.00          | [58]     |

| State                           | Type           | Service                                | Units | Min cost       | Max cost       | Source   |
|---------------------------------|----------------|----------------------------------------|-------|----------------|----------------|----------|
|                                 | Primary care   | GP appointment                         | 1     | 46.00          | 46.00          | [58]     |
|                                 | Secondary care | Outpatient visits                      | 2     | 393.02         | 393.02         | a, [58]  |
|                                 | Other services | Dietician appointment                  | 1     | 80.00          | 80.00          | [57]     |
|                                 | Medications‡   |                                        |       | 116.92         | 116.92         | [60, 63] |
| <b>Annual cost for CC state</b> |                |                                        |       | <b>1655.98</b> | <b>1795.05</b> |          |
|                                 |                |                                        |       | <b>2354.64</b> | <b>2493.71</b> |          |
| DC                              | Tests          | OGD††                                  | 1     | 276.93         | 416            | [60]     |
|                                 |                | Additional OGDs for variceal bleed††   | 4     | 1107.72        | 1664           | [60]     |
|                                 |                | Ultrasound                             | 2     | 98.70          | 98.70          | [61]     |
|                                 |                | Alpha fetoprotein                      | 2     | 9.04           | 9.04           | [61]     |
|                                 | Primary care   | GP appointments                        | 4     | 184.00         | 184.00         | a        |
|                                 | Secondary care | Emergency admission if ascites         | 1-3   | 1484.31        | 4452.93        | a, [64]  |
|                                 |                | Emergency admission of variceal bleed  | 1-3   | 1317.10        | 3951.30        | [60], a  |
|                                 |                | Emergency admission for encephalopathy | 1-3   | 2379.99        | 7139.97        | [65], a  |

|                                                                    |                               |                                                            |                               |          |          |              |
|--------------------------------------------------------------------|-------------------------------|------------------------------------------------------------|-------------------------------|----------|----------|--------------|
|                                                                    |                               | Planned admission, ascites                                 | 0<br>-<br>1<br>0              | 0        | 1070.26  | [44, 64]     |
|                                                                    |                               | Planned admission, variceal bleed                          | -<br>1<br>3                   | 0        | 901.32   | [44], a      |
|                                                                    |                               | Outpatient visits, ascites or variceal bleeds              | -<br>6                        | 568.74   | 1095.90  | [44], a      |
|                                                                    |                               | TIPS stent - in 13% of patients with variceal bleed        | 1                             | 3930     | 3930     | [55, 60]     |
|                                                                    | Other services<br>Medications | Dietician appointment                                      | 1                             | 80.00    | 80.00    | [57]         |
|                                                                    |                               | NAFLD ascites                                              |                               | 115.05   | 115.05   | [64]         |
|                                                                    |                               | NAFLD variceal bleeding                                    |                               | 20.09    | 20.09    | [60]         |
|                                                                    |                               | NAFLD encephalopathy                                       |                               | 3508.67  | 3508.67  | [66]         |
|                                                                    | Annual cost for DC state*     |                                                            |                               | 4221.30  | 9122.52  |              |
|                                                                    | HCC                           | Secondary care                                             | Nurse telephone consultations | 3        | 25.20    | 25.20        |
| Hospital admission HCC resection                                   |                               |                                                            | 1                             | 5362.01  | 5362.01  | [44, 61, 67] |
| Hospital admission – follow-up                                     |                               |                                                            | 1                             | 1535.32  | 1535.32  | [44], a      |
| Day case chemoembolisation (TACE) or radiofrequency ablation (RFA) |                               |                                                            | 1                             | 639.53   | 639.53   | [44, 61, 67] |
| Day case follow-up                                                 |                               |                                                            | 1                             | 359.98   | 359.98   | [44], a      |
|                                                                    |                               |                                                            | 4                             |          |          |              |
| Outpatient visits                                                  |                               |                                                            | -<br>7                        | 744.46   | 1271.62  | [44], a      |
|                                                                    |                               | Hospital admission - tumour recurrence (probability 17.1%) | 1                             | 916.90   | 916.90   | [47], a      |
| Medications                                                        |                               | Sorafenib                                                  |                               | 38879.17 | 38879.17 | [61]         |
| Annual cost for HCC                                                |                               |                                                            | 19150.5                       | 19677.76 |          |              |

| state**                                 |              | 5                                                                                                         |   |                                                  |
|-----------------------------------------|--------------|-----------------------------------------------------------------------------------------------------------|---|--------------------------------------------------|
| Transplant                              | All services | First year cost: based on Longworth et al and subtracting cost for 2 <sup>nd</sup> year from Ouwens et al | 1 | 89282.20 (Range 56300.60,184574.29) <sup>†</sup> |
| <b>Annual cost for transplant state</b> |              | <b>89282.20(Range 56301.60,184574.29)</b>                                                                 |   |                                                  |

a: expert opinion - panel of hepatologists (Dr Neil Guha, Prof Guru Aithal, Dr Martin James, Dr Stephen Ryder, Dr Toby Delahooke, Dr Emilie Wilkes, Dr Nick Taylor)

\* Based on d'Amico et al <sup>[68]</sup>: ascites 51.6%, bleeding 22.8%, encephalopathy 25.5%.

\*\* Based on proportion of patients in each treatment based on local audit data - surgical resection 17.7%; RFA 6.9%; TACE 32.7%; sorafenib 42.7% <sup>[45]</sup>

† Range of estimates derived from studies of the cost of the transplant and follow-up care in first year. Please refer to Table 8 for estimates and references.

‡ For breakdown of medications used and cost, please refer to Table 9

†† Interval based on cost of OGD: lower estimate £277 based on NHS reference costs, HRG-4 code FZ60Z; upper estimate based on local cost found in Harman et al <sup>[55]</sup> of £416.

**Supplementary Table 4.5: Breakdown of resource use and cost (£) across model states, standard care, subsequent years**

| State                            | Type           | Service                      | Units | Min cost      | Max cost      | Source              |
|----------------------------------|----------------|------------------------------|-------|---------------|---------------|---------------------|
| NMD                              | Primary care   | GP visit (NAFLD)             |       | 46.00         | 46.00         | a                   |
|                                  | Medications    | Glitazone (NAFLD)            |       | 19.44         | 19.44         | a                   |
| <b>Annual cost for NMD state</b> |                |                              |       | <b>65.44</b>  | <b>65.44</b>  |                     |
| SLD                              | Tests          | Liver function test          | 2     | 9.04          | 9.04          | a                   |
|                                  |                | Fibroscan                    | 1     | 37.31         | 37.31         | <sup>[69]</sup>     |
|                                  | Primary care   | GP appointment               | 1     | 46.00         | 46.00         | a                   |
|                                  | Secondary care | Consultant outpatient visits | 1     | 175.72        | 175.72        | a                   |
|                                  | Other services | Dietician appointment        | 1     | 80.00         | 80.00         | <sup>[57]</sup>     |
|                                  | Medications‡   | Glitazone                    |       | 19.44         | 19.44         | <sup>[57]</sup>     |
| <b>Annual cost for SLD state</b> |                |                              |       | <b>367.51</b> | <b>367.51</b> |                     |
| CC                               | Tests          | OGD††                        | 0.5   | 138.47        | 208           | <sup>[60]</sup>     |
|                                  |                | LFT                          | 2     | 9.04          | 9.04          | a                   |
|                                  |                | Ultrasound for HCC           | 2     | 98.70         | 98.70         | <sup>[61]</sup>     |
|                                  |                | Alpha fetoprotein            | 2     | 9.04          | 9.04          | <sup>[61]</sup>     |
|                                  | Primary care   | GP appointment               | 1     | 46.00         | 46.00         | a                   |
|                                  | Secondary care | Outpatient visits            | 2     | 351.44        | 351.44        | a                   |
|                                  | Other services | Dietician appointment        | 1     | 80.00         | 80.00         | <sup>[57]</sup>     |
|                                  | Medications‡   |                              |       | 116.92        | 116.92        | <sup>[60, 63]</sup> |
| <b>Annual cost for CC state</b>  |                |                              |       | <b>849.61</b> | <b>919.14</b> |                     |
| DC                               | Tests          | OGD††                        | 1     | 276.93        | 416           | <sup>[60]</sup>     |
|                                  |                | Additional OGDs for variceal | 4     | 1107.72       | 1664          | <sup>[60]</sup>     |

| State                     | Type           | Service                                                    | Units   | Min cost | Max cost | Source     |
|---------------------------|----------------|------------------------------------------------------------|---------|----------|----------|------------|
|                           |                | bleed††                                                    |         |          |          |            |
|                           |                | Ultrasound                                                 | 2       | 98.70    | 98.70    | [61]       |
|                           |                | Alpha fetoprotein                                          | 2       | 9.04     | 9.04     | [61]       |
|                           | Primary care   | GP appointments                                            | 4       | 184      | 184      | a          |
|                           | Secondary care | Emergency admission - ascites                              | 1-3     | 1484.31  | 4452.93  | [64]       |
|                           |                | Emergency admission – variceal bleeding                    | 1-3     | 1317.10  | 3951.30  | [60]       |
|                           |                | Emergency admission - encephalopathy                       | 1-3     | 2379.99  | 7139.97  | [65], a    |
|                           |                | Day case, ascites planned admission,                       | 6       | 2400.9   | 2400.9   | [64], [44] |
|                           |                | variceal bleeds                                            | 0-1     | 0        | 901.32   | a, [44]    |
|                           |                | Outpatient visits, ascites or variceal bleeds              | 3-6     | 527.16   | 1054.32  | a, [44]    |
|                           |                | TIPS stent - in 13% of patients with variceal bleed        | 1       | 3930     | 3930     | [60], [55] |
|                           | Other services | Dietician appointment                                      | 1       | 80.00    | 80.00    | [57]       |
|                           |                | NAFLD ascites                                              |         | 115.05   | 115.05   | [64]       |
|                           | Medications‡   | NAFLD variceal bleeding                                    |         | 20.09    | 20.09    | [60]       |
|                           |                | NAFLD encephalopathy                                       |         | 3508.67  | 3508.67  | [66]       |
| Annual cost for DC state* |                |                                                            | 5524.99 | 9887.17  |          |            |
| HCC                       | Secondary care | Nurse telephone consultations                              | 3       | 25.20    | 25.20    | a          |
|                           |                | Hospital admission, follow-up                              | 1       | 1535.32  | 1535.32  | a, [44]    |
|                           |                | Day case follow-up                                         | 1       | 359.98   | 359.98   |            |
|                           |                | Outpatient visits                                          | 4-7     | 702.88   | 1230.04  | a, [44]    |
|                           |                | Hospital admission - tumour recurrence (probability 17.1%) | 1       | 916.90   | 916.90   | [47], a    |
|                           |                |                                                            |         |          |          |            |
|                           |                |                                                            |         |          |          |            |

| State                                      | Type                             | Service                                                                                 | Units | Min cost       | Max cost                                  | Source    |
|--------------------------------------------|----------------------------------|-----------------------------------------------------------------------------------------|-------|----------------|-------------------------------------------|-----------|
|                                            | Medications                      | Sorafenib                                                                               |       | 38879.17       | 38879.17                                  | [61]      |
| <i>Annual cost for HCC state</i>           |                                  |                                                                                         |       | <i>17908.9</i> | <i>18436.2</i>                            |           |
|                                            |                                  |                                                                                         |       | <i>9</i>       | <i>1</i>                                  |           |
| Transplant                                 | Re-transplant OR subsequent care | Based on Longworth et al and Ouwens et al, refer to Table 8 for details, probability 5% | 0.05  |                | 4464.11 (range 2815.03, 228.71)†          | [48] [49] |
|                                            |                                  | Based on Ouwens et al – prob 95%                                                        | 0.95  |                | 16223.33 (range 12733.94, 16223.33) +     | [49]      |
| <i>Annual cost for Transplant state***</i> |                                  |                                                                                         |       |                | <i>20687.44 (range 15548.97-25452.04)</i> |           |

a: expert opinion - panel of hepatologists (Dr Neil Guha, Prof Guru Aithal, Dr Martin James, Dr Stephen Ryder, Dr Toby Delahooke, Dr Emilie Wilkes, Dr Nick Taylor)

\* Based on d'Amico et al<sup>[68]</sup>: ascites 52.4%, bleeding 18.8%, encephalopathy 28.8%.

\*\* Based on proportion of patients in each treatment based on local audit data - surgical resection 17.7%; RFA 6.9%; TACE 32.7%; sorafenib 42.7%<sup>[45]</sup>

\*\*\* The mean cost for the transplant state in subsequent years was calculated based on probability of 5% of retransplantation in subsequent years after the first procedure<sup>[44]</sup>, in which case the cost for first year of transplant from Longworth et al<sup>[48]</sup> would be applied; in other cases (probability 95%) the follow-up year cost from Ouwens et al<sup>[49]</sup> would be applied.

† Range of estimates derived from studies of the cost of the transplant and follow-up care in first year. Please refer to Table 8 for estimates and references.

‡ For breakdown of medications used and cost, please refer to Table 9

†† Interval based on cost of OGD: lower estimate £277 based on NHS reference costs, HRG-4 code FZ60Z; upper estimate based on local cost found in Harman et al<sup>[55]</sup> of £416.

#### Supplementary Table 4.6. Breakdown of cost studies of liver transplant used to derive the cost for transplant state in first and subsequent years

| Study                                  | design             | services                                                  | time period             | Converted to 2014 GBP | original cost | currency (year) |
|----------------------------------------|--------------------|-----------------------------------------------------------|-------------------------|-----------------------|---------------|-----------------|
| Longworth et al (2003) <sup>[48]</sup> | Prospective cohort | inpatient, outpatient, medications, other services, tests | Cost in first 27 months | 106359 first 2 years  | 66,049        | GBP (1999)      |

| Study                                      | design               | services                                | time period                                                                                                             | Converted to 2014 GBP                                    | original cost                                                                                                                  | currency (year) |
|--------------------------------------------|----------------------|-----------------------------------------|-------------------------------------------------------------------------------------------------------------------------|----------------------------------------------------------|--------------------------------------------------------------------------------------------------------------------------------|-----------------|
| Ouwens et al (2003) <sup>[49]</sup>        | Retrospective cohort | hospital, primary care costs            | first and subsequent years                                                                                              | 84574 first year, 17077 subsequent years                 | 76600 first year; 15467 average for follow-up years                                                                            | USD (1992)      |
| Taylor et al (2002) <sup>[71]</sup>        | Retrospective cohort | hospital: inpatient, medications, tests | first and subsequent years                                                                                              | 56301 first year, 4615 subsequent years                  | 69892 transplant + 9800 first 12 months follow-up; 2nd year follow-up 6533                                                     | CAD (1998)      |
| Filipponi et al (2003) <sup>[72]</sup>     | Retrospective cohort | secondary care                          | cost of transplant and initial admission only                                                                           | Total cost transplant + follow-up, non-viral 80001-89958 | non-viral 83577-93979                                                                                                          | EUR (2000)      |
| Best et al (2001) <sup>[73]</sup>          | Retrospective cohort | primary, secondary care                 | first year cost                                                                                                         | 136382                                                   | 143363 (first year cost in 1998, used most recent year due to changes in clinical practice over study period noted by authors) | USD (2000)      |
| Lang et al (2009) <sup>[74]</sup>          | Based on literature  | secondary care                          | cost of transplant and initial admission only                                                                           | 184574                                                   | 247679                                                                                                                         | USD (2009)      |
| Agthoven et al (2001) <sup>[75]</sup>      | Retrospective cohort | secondary care                          | cost of transplant and initial admission only                                                                           | 123241                                                   | 81642                                                                                                                          | EUR (1996)      |
| van der Hilst et al (2008) <sup>[76]</sup> | Meta-analysis        | secondary care                          | cost of transplant and initial admission only                                                                           | 105899 for US, 67094 (other OECD countries)              | \$163438 for US, \$103548 (other OECD countries)                                                                               | USD (2005)      |
| Bennett et al <sup>[44]</sup>              | Meta-analysis        | Secondary care                          | Cost of transplant, inpatient, outpatient care and medications in first year; cost of hospital care in subsequent years | 95766 in first year; 13404 in subsequent years           | \$95608 in first year; \$13382 in subsequent years                                                                             | USD (1997)      |

| Study                     | design                                                                          | services       | time period                                                                      | Converted to 2014 GBP                                            | original cost                                                        | currency (year) |
|---------------------------|---------------------------------------------------------------------------------|----------------|----------------------------------------------------------------------------------|------------------------------------------------------------------|----------------------------------------------------------------------|-----------------|
| Lin et al <sup>[77]</sup> | Modelling study (using prospective and retrospective previously collected data) | Secondary care | Cost of hospital resource use in first and subsequent years following transplant | 75171 in first year; 2492 in outpatient care in subsequent years | \$86078 in first year; \$2952 in outpatient care in subsequent years | USD (2003)      |

**Supplementary Table 4.7. Summary of cost estimates of first 12 months following liver transplant (including initial transplant admission) and subsequent years**

| Source                    | Estimate | Notes <sup>†</sup>                                                                  |
|---------------------------|----------|-------------------------------------------------------------------------------------|
| First year cost           |          |                                                                                     |
| Taylor                    | 56301    | Cost in first year                                                                  |
| Filipponi, lower estimate | 62924    | Cost in first 2 years minus Ouwens estimate for 2 <sup>nd</sup> year cost           |
| van der Hilst             | 67094    | Cost in first year                                                                  |
| Filipponi, upper estimate | 72881    | Cost in first 2 years minus Ouwens estimate for 2 <sup>nd</sup> year cost           |
| Lin                       | 75171    | Cost in first year                                                                  |
| Ouwens                    | 84574    | Cost in first year                                                                  |
| Longworth                 | 89282    | Cost in first 2 years minus Ouwens estimate for 2 <sup>nd</sup> year cost           |
| Bennett                   | 95766    | Cost in first year                                                                  |
| Agthoven                  | 123241   | Cost in first year                                                                  |
| Best                      | 136382   | Cost in first year                                                                  |
| Lang                      | 184574   | Cost in first year                                                                  |
| Cost in subsequent years  |          |                                                                                     |
| Bennett                   | 13404    | Cost in second year, excluding cost of possible re-transplant, already incorporated |

| Source | Estimate | Notes <sup>†</sup>  |
|--------|----------|---------------------|
|        |          | in the state cost   |
| Ouwens | 17077    | Cost in second year |

<sup>†</sup>In certain cases, cost was calculated based on multiple sources due to differences in length of follow-up or cost estimation methods across individual studies. Some studies included cost in the first 2 years following transplant (e.g. Logworth et al). In order to estimate the cost of first year, the most reliable estimate of second year cost (Ouwens et al) was subtracted from 2-year estimates

**Supplementary Table 4.8. Summary of unit costs across healthcare sector**

| Type           | Resource use                 | Diagnosis                                                            | Unit cost | Notes                                                                                          | Unit cost source                 |
|----------------|------------------------------|----------------------------------------------------------------------|-----------|------------------------------------------------------------------------------------------------|----------------------------------|
| Primary care   | GP clinic visit              |                                                                      | 46        | Based on patient contact of 11.7 minutes                                                       | [51]                             |
| Secondary care | Nurse telephone consultation |                                                                      | 8.40      | Based on consultation length of 6 mins, band 5 NHS staff earnings estimate for qualified nurse | [51]                             |
|                | emergency admission          | Liver cirrhosis                                                      | 1685.99   | Based on elective admission, HRG GC17K                                                         | NHS reference costs 2013/14 [50] |
|                | emergency admission          | Ascites                                                              | 1484.31   | Based on elective admission, HRG FZ91M                                                         | [50]                             |
|                | emergency admission          | Oesophageal varices with bleeding                                    | 1317.1    | Based on elective admission, HRG FZ38P                                                         | [50]                             |
|                | emergency admission          | HCC                                                                  | 1842.42   | Based on elective admission, HRG GC12K                                                         | [50]                             |
|                | emergency admission          | Encephalopathy                                                       | 2379.99   | Based on non-elective admission, HRG AA22G                                                     | [50]                             |
|                | outpatient visit             | Liver fibrosis, cirrhosis, ascites, varices or HCC – first visit     | 217.30    | Based on consultant-led outpatient visit, TFC 306                                              | [50]                             |
|                | outpatient visit             | Liver fibrosis, cirrhosis, ascites, varices or HCC – follow-up visit | 175.72    | Based on consultant-led outpatient visit, TFC 306                                              | [50]                             |
|                | Planned admission            | Ascites                                                              | 1070.26   | Based on elective admission, HRG FZ91M                                                         | [50]                             |
|                | Planned admission            | Oesophageal varices with bleeding                                    | 901.32    | Based on elective admission, HRG FZ38P                                                         | [50]                             |
|                | Planned admission            | Liver cirrhosis                                                      | 1061.54   | Based on elective admission, HRG GC17K                                                         | [50]                             |



| Type  | Resource use         | Diagnosis                         | Unit cost | Notes                                                                                                         | Unit cost source                                                                              |
|-------|----------------------|-----------------------------------|-----------|---------------------------------------------------------------------------------------------------------------|-----------------------------------------------------------------------------------------------|
|       | Planned admission    | HCC resection                     | 5362.01   | Based on elective admission, HRG GA06D                                                                        | [50]                                                                                          |
|       | Planned admission    | HCC follow-up                     | 1535.32   | Based on elective admission, HRG GC12K                                                                        | [50]                                                                                          |
|       | Transplant           | First year cost                   | 89282     | Based on Longworth et al - cost of first 12 months, inflated to 2014 prices                                   | [48]                                                                                          |
|       | Transplant           | Subsequent years cost             | 17077     | Based on Ouwers et al - cost in subsequent years, converted to GBP and inflated to 2014 prices                | [49]                                                                                          |
|       | Day case             | Day case chemoembolisation (TACE) | 639.53    | Based on day case cost, HRG GC12F                                                                             | [50]                                                                                          |
|       | Day case             | HCC follow-up                     | 359.98    | Based on day case, HRG GC12K                                                                                  | [50]                                                                                          |
|       | Day case             | Ascites                           | 400.15    | Based on ascites, HRG FZ91M                                                                                   | [50]                                                                                          |
|       | TIPS stent           | Variceal bleed                    | 3930      | Based on local cost                                                                                           | Harman et al - Economic modelling of early TIPS insertion for acute variceal haemorrhage [55] |
| Tests | OGD (lower estimate) |                                   | 276.93    | Based on outpatient visit, HRG FZ60Z                                                                          | [50]                                                                                          |
|       | OGD (upper estimate) |                                   | 416       | Local cost estimate                                                                                           | Harman et al - Economic modelling of early TIPS insertion for acute variceal haemorrhage [55] |
|       | Fibroscan            |                                   | 37.30     | York HE Consortium: An Economic Evaluation of Ultrasound Elastography in the Diagnosis of Liver Fibrosis [53] |                                                                                               |
|       | Hep B/C scan         |                                   | 30        | Local cost estimate                                                                                           | Cost of HCV and HBV combined serology quoted by QMC virology department                       |
|       | liver biopsy         |                                   | 546.02    | Based on day cost procedure, HRG CZ36Y, inflated to 2014                                                      | [50]                                                                                          |
|       | Liver function test  |                                   | 4.52      | [54], average across 3 sites                                                                                  |                                                                                               |

| Type           | Resource use                     | Diagnosis | Unit cost | Notes                                                                                                    | Unit cost source |
|----------------|----------------------------------|-----------|-----------|----------------------------------------------------------------------------------------------------------|------------------|
|                | ultrasound                       |           | 49.35     | Based on outpatient visit, HRG RA23Z                                                                     | [50]             |
|                | alpha fetoprotein                |           | 4.52      | [32]                                                                                                     |                  |
|                | Autoimmune liver screen          |           | 13        | Wright et al (2006), average across 3 sites                                                              |                  |
| Other services | Alcohol referral services IF ALD |           | 778.66    | Psychological community-based programme: £741.67 (NICE (2011) - Alcohol-use disorders, inflated to 2014) | [70]             |
|                | dietician appointment IF FLD     |           | 80        | Dietician outpatient visit                                                                               | [50]             |
|                | Hospital transport               |           | 231       | Based on NHS ref cost: ambulance service code ASS02                                                      | [50]             |



## Appendix 5. One-way sensitivity analyses

Many of the model parameters were subject to one-way sensitivity analysis, using hypothetical increases or decreases, to determine the key drivers of the model results. These assumed extreme values of input parameters. The following parameters were included in one-way sensitivity analyses:

- Costs
  - transplant (1<sup>st</sup> and subsequent years), range as in Table 3
  - HCC (1<sup>st</sup> and subsequent years), range as in Table 3
  - DC (1<sup>st</sup> and subsequent years), range as in Table 3
  - NMD in the RSP (subsequent years), fibroscan once per 5 years as an alternative to base-case (once per 3 years)
  - CC in the RSP (1<sup>st</sup> and subsequent years), range as in Table 3
  - CC in SC (1<sup>st</sup> and subsequent years), range as in Table 3
- Utilities
  - Transplant, limits of 95%CI, Table 2
  - HCC, limits of 95%CI, Table 2
  - DC, limits of 95%CI, Table 2
  - utility decrement for cirrhosis detection, arbitrary 0-0.2 (see Table 2)
- Transition probabilities
  - Effect of detection/intervention on fibrosis progression, lower limit of 95%CI for progression rate reduction (Table 2.4b in Appendix 2) – maximal effect, and no effect (RR=1) – minimal effect.
  - Effect of detection/intervention on cirrhosis progression/mortality, minimal and maximal multipliers based on expert panel responses (see Table 2.3 in Appendix 2)
  - Fibrosis progression, limits of 95%CI, Table 1a, and range for acceleration of progression as indicated by experts (see Appendix 2)
  - Cirrhosis progression/mortality, limits of 95% CI in <sup>[21]</sup>, see Table 2.4b in Appendix 2
  - Probabilities of detection NMD/SLD/CC in RSP and SC, arbitrary increase and decrease by 20 percentage points (0% assumed if negative percentage).
  - Mortality after transplant, alternative value as in <sup>[16]</sup>
  - Probability of developing HCC from cirrhosis, range as in <sup>[16]</sup>, see Table 2.4b in Appendix 2
  - Cut-off age for transplant from both DC and HCC, arbitrary from 65yrs to 80 yrs

The detailed assumptions and the results of one-way sensitivity analyses are presented in Table 5.1.

**Supplementary Table 5. 1. Assumptions and results of one-way sensitivity analyses (NAFLD model)**

| Parameter<br>(base-case value) | Minimal/<br>maximal /<br>alternative<br>value | Comment / source                                                               | Incremental<br>cost (£) | Incremental<br>QALY | ICER<br>(£/QALY<br>) |
|--------------------------------|-----------------------------------------------|--------------------------------------------------------------------------------|-------------------------|---------------------|----------------------|
| <b>Base case</b>               |                                               |                                                                                | 512                     | 0.24                | 2138                 |
| <b>Costs (£)</b>               |                                               |                                                                                |                         |                     |                      |
| <b>Cost of transplant</b>      | 56301                                         | The lowest estimate identified <sup>[78]</sup> , see Table 4.7<br>(Appendix 4) | 512                     |                     | 2138                 |

| Parameter<br>(base-case value)                     | Minimal/<br>maximal /<br>alternative<br>value | Comment / source                                                | Incremental<br>cost (£)                       | Incremental<br>QALY | ICER<br>(£/QALY<br>) |      |
|----------------------------------------------------|-----------------------------------------------|-----------------------------------------------------------------|-----------------------------------------------|---------------------|----------------------|------|
| (1 <sup>st</sup> year), 89282                      | 184574                                        | The highest estimate identified <sup>[27]</sup> , see Table 4.7 | 512                                           | 0.24                | 2138                 |      |
| Cost of transplant<br>(subsequent years),<br>20687 | 15549                                         | The lowest estimated cost, see Tables 4.3, 4.5, and 4.6-4.7     | 512                                           |                     | 2138                 |      |
|                                                    | 25452                                         | The highest estimated cost, see Tables 4.3, 4.5, and 4.6-4.7    | 512                                           |                     | 2138                 |      |
| Cost of HCC<br>(1 <sup>st</sup> year),<br>19414    | 19151                                         | Assumed 4 outpatient visits per year, see Table 4.2             | 513                                           |                     | 2143                 |      |
|                                                    | 19678                                         | Assumed 7 outpatient visits per year, Table 4.2                 | 511                                           |                     | 2134                 |      |
| Cost of HCC<br>(subsequent years),<br>18172        | 17909                                         | Assumed 4 outpatient visits per year, see Table 4.3             | 514                                           |                     | 2148                 |      |
|                                                    | 18436                                         | Assumed 7 outpatient visits per year, Table 4.3                 | 509                                           |                     | 2129                 |      |
| Cost of DC<br>(1 <sup>st</sup> year), 6672         | 4221                                          | The lowest estimate (see Table 3)                               | 600                                           |                     | 2507                 |      |
|                                                    | 9123                                          | The highest estimate (see Table 3)                              | 423                                           |                     | 1770                 |      |
| Cost of DC<br>(subsequent years),<br>7706          | 5525                                          | The lowest estimate (see Table 3)                               | 716                                           |                     | 2992                 |      |
|                                                    | 9887                                          | The highest estimate (see Table 3)                              | 307                                           |                     | 1285                 |      |
| Cost of NMD, RSP<br>(subsequent years),<br>158     | 153                                           | Fibroscan test once per 5 years                                 | 490                                           |                     | 2050                 |      |
| Cost of CC, RSP,<br>1721                           | 1651                                          | The lowest and the highest estimate (see Table 3 for details)   | 499                                           |                     | 2086                 |      |
|                                                    | 1791                                          |                                                                 | 524                                           |                     | 2191                 |      |
| Cost of CC, RSP<br>(subsequent years),<br>921      | 887                                           |                                                                 | 497                                           |                     | 2079                 |      |
|                                                    | 956                                           |                                                                 | 526                                           |                     | 2200                 |      |
| Cost of CC, SC,<br>1725                            | 1656                                          |                                                                 | 514                                           |                     | 2150                 |      |
|                                                    | 1795                                          |                                                                 | 509                                           |                     | 2127                 |      |
| Cost of CC, SC<br>(subsequent years),<br>884       | 850                                           |                                                                 | 515                                           |                     | 2151                 |      |
|                                                    | 919                                           |                                                                 | 508                                           |                     | 2125                 |      |
| <i>Utilities</i>                                   |                                               |                                                                 |                                               |                     |                      |      |
| Transplant utility,<br>0.69                        | 0.62                                          |                                                                 | Lower 95%CI limit <sup>[39]</sup> see Table 2 |                     | 0.24                 | 2138 |
|                                                    | 0.77                                          | Upper 95% CI limit <sup>[39]</sup> , see                        | 0.24                                          |                     | 2138                 |      |

| Parameter<br>(base-case value)                                                 | Minimal/<br>maximal /<br>alternative<br>value | Comment / source                                                                         | Incremental<br>cost (£) | Incremental<br>QALY | ICER<br>(£/QALY<br>) |
|--------------------------------------------------------------------------------|-----------------------------------------------|------------------------------------------------------------------------------------------|-------------------------|---------------------|----------------------|
|                                                                                |                                               | Table 2                                                                                  | 512                     |                     |                      |
| HCC utility, 0.65                                                              | 0.44                                          | Lower 95%CI limit, Table 2                                                               |                         | 0.24                | 2115                 |
|                                                                                | 0.86                                          | Upper 95%CI limit, Table 2                                                               |                         | 0.24                | 2163                 |
| DC utility, 0.66                                                               | 0.46                                          | Lower 95%CI limit, Table 2                                                               |                         | 0.27                | 1929                 |
|                                                                                | 0.86                                          | Upper 95%CI limit, Table 2                                                               |                         | 0.21                | 2398                 |
| Utility decrement<br>for detection of CC,<br>0.1                               | 0                                             | Arbitrary assumption                                                                     |                         | 0.29                | 1789                 |
|                                                                                | 0.2                                           | Arbitrary assumption                                                                     |                         | 0.19                | 2658                 |
| Probabilities                                                                  |                                               |                                                                                          |                         |                     |                      |
| Reduction of<br>progression from<br>SLD to CC (relative<br>risk, RR), 0.63     | 0.06                                          | Lower limit of 95%CI, see<br>Appendix 2                                                  | -766                    | 0.40                | -1895                |
|                                                                                | 1                                             | Assumed no effect                                                                        | 971                     | 0.16                | 5948                 |
| Reduction of<br>progression from<br>NMD to SLD<br>(relative risk, RR),<br>0.67 | 0.21                                          | Lower limit of 95%CI, see<br>section Appendix 2                                          | -594                    | 0.32                | -1852                |
|                                                                                | 1                                             | Assumed no effect                                                                        | 1126                    | 0.19                | 5969                 |
| Probability of<br>decompensation<br>multiplier (CC- to<br>DC)*, 1.7            | 1.5                                           | Minimal and maximal<br>multipliers based on expert<br>panel responses (see Table<br>2.3) | 600                     | 0.22                | 2686                 |
|                                                                                | 2.0                                           |                                                                                          | 364                     | 0.26                | 1373                 |
| Mortality from CC-<br>multiplier**, 1.4                                        | 1.0                                           |                                                                                          | 488                     | 0.24                | 2069                 |
|                                                                                | 2.0                                           |                                                                                          | 549                     | 0.25                | 2246                 |
| Probability of HCC<br>multiplier (CC- to<br>HCC)***, 1.1                       | 1.0                                           |                                                                                          | 543                     | 0.24                | 2282                 |
|                                                                                | 1.3                                           |                                                                                          | 413                     | 0.24                | 1695                 |
| Probability CCI to<br>CCII multiplier<br>(undetected), 1.45                    | 1.4                                           |                                                                                          | 513                     | 0.24                | 2144                 |
|                                                                                | 1.5                                           |                                                                                          | 510                     | 0.24                | 2133                 |
| Fibrosis progression<br>rate                                                   | 0.06                                          | Lower 95%CI limit in <sup>[79]</sup>                                                     | 857                     | 0.12                | 7032                 |
|                                                                                | 0.18                                          | Upper 95%CI limit in <sup>[79]</sup>                                                     | 321                     | 0.35                | 928                  |
| Acceleration of<br>progression****,<br>14.8 / 9.2 / 5.7 / 3.6                  | 13.1 / 9.2 /<br>6.5 / 4.1                     | The lowest acceleration rate<br>as indicated by experts                                  | 549                     | 0.21                | 2561                 |
|                                                                                | 16.5 / 9.1 /<br>5.0 / 2.7                     | The highest acceleration rate<br>as indicated by experts                                 | 478                     | 0.27                | 1800                 |
| Probability<br>CCI ->DCIII, 16.4%                                              | 14.4%                                         |                                                                                          | 557                     | 0.24                | 2346                 |
|                                                                                | 18.5%                                         |                                                                                          | 470                     | 0.24                | 1953                 |
| CCI->DCIV, 0.8%                                                                | 0.4%                                          |                                                                                          | 525                     | 0.24                | 2195                 |
|                                                                                | 1.5%                                          |                                                                                          | 489                     | 0.24                | 2044                 |
| CCII->DCIII, 17.1%                                                             | 13.8%                                         |                                                                                          | 518                     | 0.24                | 2163                 |
|                                                                                | 20.8%                                         |                                                                                          | 506                     | 0.24                | 2117                 |

| Parameter<br>(base-case value)                                                        | Minimal/<br>maximal /<br>alternative<br>value | Comment / source                                                                                      | Incremental<br>cost (£) | Incremental<br>QALY | ICER<br>(£/QALY<br>) |
|---------------------------------------------------------------------------------------|-----------------------------------------------|-------------------------------------------------------------------------------------------------------|-------------------------|---------------------|----------------------|
| CCII->DCIV, 5.1%                                                                      | 3.3%                                          | Lower and upper limits of 95%<br>CIs in <sup>[21]</sup>                                               | 517                     | 0.24                | 2160                 |
|                                                                                       | 7.5%                                          |                                                                                                       | 506                     | 0.24                | 2115                 |
| CCI ->death, 7.5%                                                                     | 6.1%                                          |                                                                                                       | 491                     | 0.24                | 2072                 |
|                                                                                       | 9.1%                                          |                                                                                                       | 533                     | 0.24                | 2207                 |
| CCII->death, 6.6%                                                                     | 3.9%                                          |                                                                                                       | 509                     | 0.24                | 2128                 |
|                                                                                       | 10.3%                                         |                                                                                                       | 515                     | 0.24                | 2152                 |
| DCIII to death,<br>25.1%                                                              | 22.3%                                         |                                                                                                       | 413                     | 0.23                | 1783                 |
|                                                                                       | 28.1%                                         |                                                                                                       | 601                     | 0.25                | 2442                 |
| DCIV to death,<br>20.4%                                                               | 16.2%                                         |                                                                                                       | 474                     | 0.24                | 2005                 |
|                                                                                       | 25.2%                                         |                                                                                                       | 543                     | 0.24                | 2247                 |
| CC1 to CCIII, 3.2%                                                                    | 2.3%                                          |                                                                                                       | 515                     | 0.24                | 2154                 |
|                                                                                       | 4.4%                                          |                                                                                                       | 507                     | 0.24                | 2118                 |
| DCIII to DCIV, 3.2%                                                                   | 2.1%                                          |                                                                                                       | 517                     | 0.24                | 2158                 |
|                                                                                       | 4.6%                                          |                                                                                                       | 505                     | 0.24                | 2115                 |
| Probability of<br>detection<br>NMD/SLD/CC RSP,<br>73.7%                               | 53.7%                                         | Arbitrary increase and<br>decrease by 20 percentage<br>points (0% assumed if<br>negative percentage). | 408                     | 0.20                | 2032                 |
|                                                                                       | 93.7%                                         |                                                                                                       | 586                     | 0.27                | 2204                 |
| Probability of<br>detection NMD, SC,<br>2.0%                                          | 0%                                            |                                                                                                       | 557                     | 0.25                | 2265                 |
|                                                                                       | 22.0%                                         |                                                                                                       | 344                     | 0.20                | 1719                 |
| Probability of<br>detection SLD, SC,<br>16.5%                                         | 0%                                            |                                                                                                       | 619                     | 0.35                | 1773                 |
|                                                                                       | 36.5%                                         |                                                                                                       | 443                     | 0.18                | 2497                 |
| Probability of<br>detection CC, SC,<br>8.2%                                           | 0%                                            |                                                                                                       | 613                     | 0.26                | 2382                 |
|                                                                                       | 28.2%                                         |                                                                                                       | 313                     | 0.20                | 1530                 |
| Mortality 1 <sup>st</sup> year<br>after transplant,<br>16.6%                          | 12%                                           | Alternative input parameter<br><sup>[16]</sup>                                                        | 512                     | 0.24                | 2138                 |
| Probability CC+ to<br>HCC, 3%                                                         | 0.7%                                          | The minimal value in <sup>[16]</sup>                                                                  | 561                     | 0.24                | 2313                 |
|                                                                                       | 5%                                            | The maximal value in <sup>[16]</sup>                                                                  | 467                     | 0.24                | 1969                 |
| Cut-off age for<br>transition<br>probability to<br>transplant from<br>both DC and HCC | 65 yrs                                        | Assumed cut-off for DC to<br>transplant the same as for<br>HCC                                        | 512                     | 0.24                | 2138                 |
|                                                                                       | 70 yrs                                        | Assumed cut-off for HCC to<br>transplant the same as for DC                                           | 512                     | 0.24                | 2138                 |
|                                                                                       | 80 yrs                                        | Arbitrary                                                                                             | -495                    | 0.22                | -2254                |

\* Expert panel (see Table 2.3). Annual probability of progression from CC- to DC was obtained by multiplying probability of progression from CC+ to DC.

\*\* Expert panel (see Table 2.3). Annual probability of death from CC- was obtained by multiplying probability of death from CC+.

\*\*\* Expert panel (see Table 2.3). Annual probability of HCC from CC- was obtained by multiplying probability of HCC from CC+.

\*\*\*\* Notation: 14.8 / 9.2 / 5.7 / 3.6 reflects stage 0 to 1, stage 1 to 2, stage 2 to 3, and stage 3 to 4 mean times of progression in years, respectively.

To test the impact of the input parameters obtained from the RSP feasibility study, a wider one-way sensitivity analysis for the probabilities of identifying/detecting NMD/SLD/CC was conducted, to explore how incremental costs and QALYs contributed to overall cost-effectiveness, when changing these detection probabilities. Figures 5.1, 5.2, and 5.3 show incremental cost, effect, and ICER, respectively, for all possible values of these probabilities. From Figure 1 we know that the life-time incremental cost increases with detection probability in the RSP and decreases with detection probabilities in SC. This suggests that the direct impact of better diagnostic accuracy in RSP, compared to SC, on fibrosis/cirrhosis management cost exceeds the lifetime cost savings due to earlier detection and treatment of fibrosis/cirrhosis. However, the health benefits of earlier detection upon RSP, when compared to SC, are clear - both higher probability of detection NMD/SLD/CC in RSP and lower detection probabilities in SC lead to higher incremental QALY (Figure 2), RSP vs. SC. Excluding less favourable case of worse health state at lower costs (and negative ICERs upon RSP being dominant), ICER is stable around 1,700-2,200 £/QALY for the probability of NMD/SLD/CC detection in RSP ranging from 20% to 100% (Figure 5.3).



**Supplementary Figure 5.1. Incremental cost as the function of the probability of fibrosis/cirrhosis detection in RSP and SC**

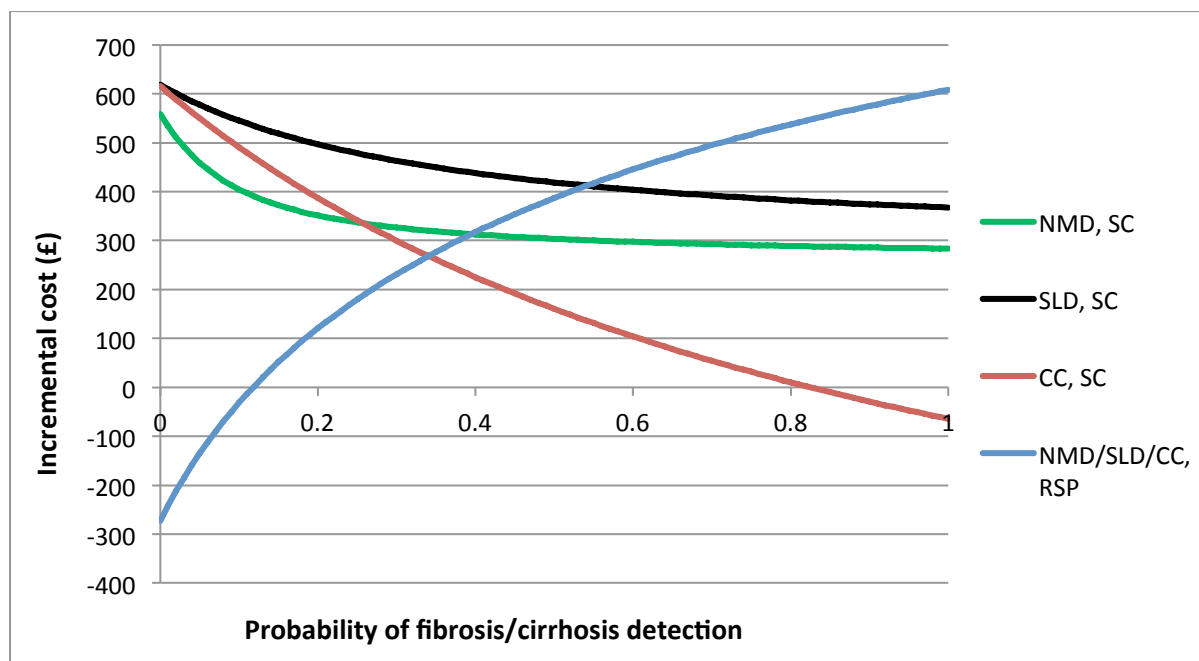

**Supplementary Figure 5. 2. Incremental QALY as the function of the probability of fibrosis/cirrhosis detection in RSP and SC**

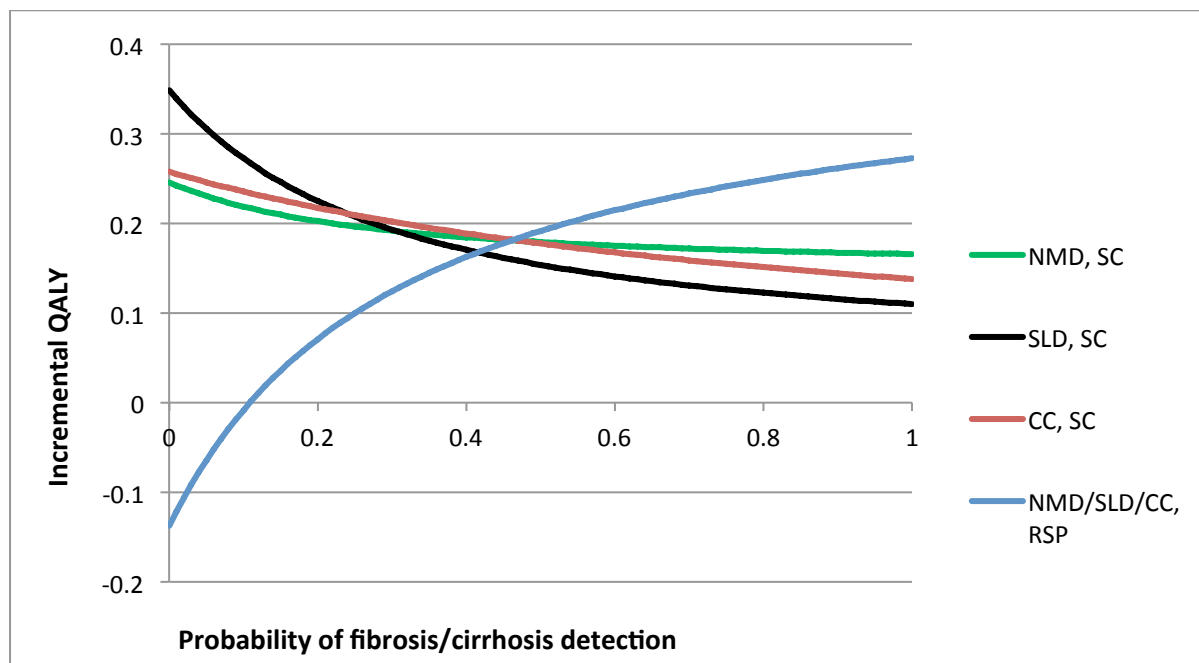

**Supplementary Figure 5.3. Incremental cost-effectiveness ratio (ICER) as the function of the probability of fibrosis/cirrhosis detection in RSP and SC**

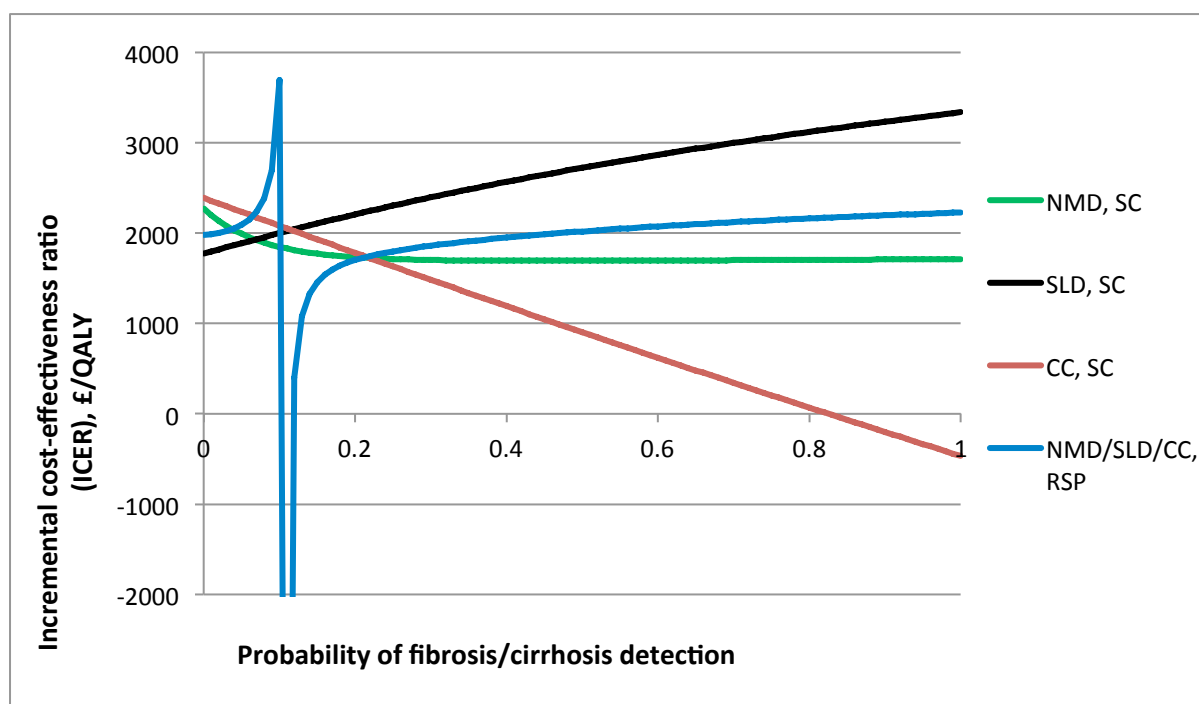

## References

1. Friedrich-Rust M, Ong MF, Martens S, Sarrazin C, Bojunga J, Zeuzem S, et al. **Performance of transient elastography for the staging of liver fibrosis: a meta-analysis.** *Gastroenterology* 2008; 134(4):960-974.
2. Sandrin L, Fourquet B, Hasquenoph JM, Yon S, Fournier C, Mal F, et al. **Transient elastography: a new noninvasive method for assessment of hepatic fibrosis.** *Ultrasound in medicine & biology* 2003; 29(12):1705-1713.
3. Nguyen-Khac E, Chatelain D, Tramier B, Decrombecque C, Robert B, Joly JP, et al. **Assessment of asymptomatic liver fibrosis in alcoholic patients using fibroscan: prospective comparison with seven non-invasive laboratory tests.** *Alimentary Pharmacology & Therapeutics* 2008; 28(10):1188-1198.
4. Roulot D, Czernichow S, Le Clesiau H, Costes JL, Vergnaud AC, Beaugrand M. **Liver stiffness values in apparently healthy subjects: influence of gender and metabolic syndrome.** *J Hepatol* 2008; 48(4):606-613.
5. Wong VW, Vergniol J, Wong GL, Foucher J, Chan HL, Le Bail B, et al. **Diagnosis of fibrosis and cirrhosis using liver stiffness measurement in nonalcoholic fatty liver disease.** *Hepatology (Baltimore, Md)* 2010; 51(2):454-462.
6. Myers RP, Pomier-Layrargues G, Kirsch R, Pollett A, Duarte-Rojo A, Wong D, et al. **Feasibility and diagnostic performance of the FibroScan XL probe for liver stiffness measurement in overweight and obese patients.** *Hepatology (Baltimore, Md)* 2012; 55(1):199-208.
7. Harman DJ, Ryder SD, James MW, Jelpke M, Ottey DS, Wilkes EA, et al. **Direct targeting of risk factors significantly increases the detection of liver cirrhosis in primary care: a cross-sectional diagnostic study utilising transient elastography.** *BMJ Open* 2015; 5(4):e007516.
8. BLT. **Love Your Liver. A British Liver Trust Campaign: to pioneer liver health.** In: *www.britishlivertrust.org.uk*; 2012.
9. Ekstedt M, Hagstrom H, Nasr P, Fredrikson M, Stal P, Kechagias S, et al. **Fibrosis stage is the strongest predictor for disease-specific mortality in NAFLD after up to 33 years of follow-up.** *Hepatology (Baltimore, Md)* 2015; 61(5):1547-1554.
10. Singh S, Allen AM, Wang Z, Prokop LJ, Murad MH, Loomba R. **Fibrosis progression in nonalcoholic fatty liver vs nonalcoholic steatohepatitis: a systematic review and meta-analysis of paired-biopsy studies.** *Clinical gastroenterology and hepatology : the official clinical practice journal of the American Gastroenterological Association* 2015; 13(4):643-654 e641-649; quiz e639-640.
11. Adams LA, Harmsen S, St Sauver JL, Charatcharoenwitthaya P, Enders FB, Therneau T, et al. **Nonalcoholic fatty liver disease increases risk of death among patients with diabetes: a community-based cohort study.** *American Journal of Gastroenterology* 2010; 105(7):1567-1573.
12. Wong RJ, Aguilar M, Cheung R, Perumpail RB, Harrison SA, Younossi ZM, et al. **Nonalcoholic steatohepatitis is the second leading etiology of liver disease among adults awaiting liver transplantation in the United States.** *Gastroenterology* 2015; 148(3):547-555.
13. Wong VW, Wong GL, Choi PC, Chan AW, Li MK, Chan HY, et al. **Disease progression of non-alcoholic fatty liver disease: a prospective study with paired liver biopsies at 3 years.** *Gut* 2010; 59(7):969-974.
14. Ratzliff V, Giral P, Jacqueminet S, Charlotte F, Hartemann-Heurtier A, Serfaty L, et al. **Rosiglitazone for Nonalcoholic Steatohepatitis: One-Year Results of the Randomized Placebo-Controlled Fatty Liver Improvement With Rosiglitazone Therapy (FLIRT) Trial.** *Gastroenterology* 2008; 135(1):100-110.
15. Kon P. **Avandia and Avandamet (rosiglitazone). Suspension of marketing: benefits no longer outweigh risks. Letter for healthcare professionals.**  
<http://webarchive.nationalarchives.gov.uk/20141205150130/http://www.mhra.gov.uk/Safetyinformation/Safetywarningsalertsandrecalls/Safetywarningsandmessagesformedicines/Monthlylistsofinformationforhealthcareprofessionalsonthesafetyofmedicines/CON096743>. Last accessed 11/03/2016. 2010.
16. Mahady SE, Wong G, Craig JC, George J. **Pioglitazone and vitamin E for nonalcoholic steatohepatitis: A cost utility analysis.** *Hepatology (Baltimore, Md)* 2012; 56(6):2172-2179.
17. Musso G, Gambino R, Cassader M, Pagano G. **A meta-analysis of randomized trials for the treatment of nonalcoholic fatty liver disease.** *Hepatology* 2010; 52(1):79-104.

18. Ratziu V, Charlotte F, Bernhardt C, Giral P, Halbron M, LeNaour G, et al. **Long-term efficacy of rosiglitazone in nonalcoholic steatohepatitis: Results of the fatty liver improvement by rosiglitazone therapy (FLIRT 2) extension trial.** *Hepatology* 2010; 51(2):445-453.
19. Bhala N, Angulo P, van der Poorten D, Lee E, Hui JM, Saracco G, et al. **The natural history of nonalcoholic fatty liver disease with advanced fibrosis or cirrhosis: An international collaborative study.** *Hepatology* 2011; 54(4):1208-1216.
20. Holman RR, Paul SK, Bethel MA, Matthews DR, Neil HAW. **10-Year Follow-up of Intensive Glucose Control in Type 2 Diabetes.** *New England Journal of Medicine* 2008; 359(15):1577-1589.
21. Fleming KM, Aithal GP, Card TR, West J. **The rate of decompensation and clinical progression of disease in people with cirrhosis: a cohort study.** *Alimentary pharmacology & therapeutics* 2010; 32(11-12):1343-1350.
22. Sanyal AJ, Banas C, Sargeant C, Luketic VA, Sterling RK, Stravitz RT, et al. **Similarities and differences in outcomes of cirrhosis due to nonalcoholic steatohepatitis and hepatitis C.** *Hepatology* 2006; 43(4):682-689.
23. Ascha MS, Hanouneh IA, Lopez R, Tamimi TA-R, Feldstein AF, Zein NN. **The incidence and risk factors of hepatocellular carcinoma in patients with nonalcoholic steatohepatitis.** *Hepatology* 2010; 51(6):1972-1978.
24. Ratziu V, Bonyhay L, Di Martino V, Charlotte F, Cavallaro L, Sayegh-Tainturier M-H, et al. **Survival, liver failure, and hepatocellular carcinoma in obesity-related cryptogenic cirrhosis.** *Hepatology* 2002; 35(6):1485-1493.
25. Yatsuji S, Hashimoto E, Tobari M, Taniai M, Tokushige K, Shiratori K. **Clinical features and outcomes of cirrhosis due to non-alcoholic steatohepatitis compared with cirrhosis caused by chronic hepatitis C.** *Journal of Gastroenterology and Hepatology* 2009; 24(2):248-254.
26. Perry JF, Charlton B, Koorey DJ, Waugh RC, Gallagher PJ, Crawford MD, et al. **Outcome of patients with hepatocellular carcinoma referred to a tertiary centre with availability of multiple treatment options including cadaveric liver transplantation.** *Liver International* 2007; 27(9):1240-1248.
27. Lang K, Danchenko N, Gondek K, Shah S, Thompson D. **The burden of illness associated with hepatocellular carcinoma in the United States.** *Journal of Hepatology*; 50(1):89-99.
28. Altekruse SF, McGlynn KA, Reichman ME. **Hepatocellular Carcinoma Incidence, Mortality, and Survival Trends in the United States From 1975 to 2005.** *Journal of Clinical Oncology* 2009; 27(9):1485-1491.
29. Wang X, Li J, Riaz DR, Shi G, Liu C, Dai Y. **Outcomes of Liver Transplantation for Nonalcoholic Steatohepatitis: A Systematic Review and Meta-analysis.** *Clinical Gastroenterology and Hepatology*; 12(3):394-402.e391.
30. Liu S, Schwarzingen M, Carrat F, Goldhaber-Fiebert JD. **Cost effectiveness of fibrosis assessment prior to treatment for chronic hepatitis C patients.** *PLoS One* 2011; 6(12):e26783.
31. Liu S, Cipriano LE, Holodniy M, Owens DK, Goldhaber-Fiebert JD. **New protease inhibitors for the treatment of chronic hepatitis C: a cost-effectiveness analysis.** *Ann Intern Med* 2012; 156(4):279-290.
32. Thompson Coon J, Rogers G, Hewson P, Wright D, Anderson R, Cramp M, et al. **Surveillance of cirrhosis for hepatocellular carcinoma: systematic review and economic analysis.** *Health technology assessment* 2007; 11(34):1-206.
33. Ratcliffe J, Longworth L, Young T, Bryan S, Burroughs A, Buxton M. **Assessing health-related quality of life pre- and post-liver transplantation: a prospective multicenter study.** *Liver transplantation : official publication of the American Association for the Study of Liver Diseases and the International Liver Transplantation Society* 2002; 8(3):263-270.
34. Schwierz CT, N.; Van De Sande, S.; Mohamed, G.; Frederik, N. ;Colle, I.; Yvres, H. ;Hulstaert, F.;. **Economic evaluation of antiviral treatment of chronic hepatitis B in Belgium – Part 2. Health Technology Assessment (HTA).** In; 2010.
35. Hulstaert F, Schwierz C, Nevens F, Thiry N, Gamil M, Colle I, et al. **Should chronic hepatitis B be treated as early as possible?** *International journal of technology assessment in health care* 2013; 29(1):35-41.
36. Scalone L, Ciampichini R, Fagioli S, Gardini I, Fusco F, Gaeta L, et al. **Comparing the performance of the standard EQ-5D 3L with the new version EQ-5D 5L in patients with chronic hepatic diseases.** *Quality of life research : an international journal of quality of life aspects of treatment, care and rehabilitation* 2013; 22(7):1707-1716.

37. Wright M, Grieve R, Roberts J, Main J, Thomas HC. **Health benefits of antiviral therapy for mild chronic hepatitis C: randomised controlled trial and economic evaluation.** *Health technology assessment (Winchester, England)* 2006; 10(21):1-113, iii.
38. Tsochatzis EA, Crossan C, Longworth L, Gurusamy K, Rodriguez-Peralvarez M, Mantzoukis K, et al. **Cost-effectiveness of noninvasive liver fibrosis tests for treatment decisions in patients with chronic hepatitis C.** *Hepatology (Baltimore, Md)* 2014; 60(3):832-843.
39. Chong CA, Gulamhussein A, Heathcote EJ, Lilly L, Sherman M, Naglie G, et al. **Health-state utilities and quality of life in hepatitis C patients.** *The American journal of gastroenterology* 2003; 98(3):630-638.
40. Levy AR, Kowdley KV, Iloeje U, Tafesse E, Mukherjee J, Gish R, et al. **The impact of chronic hepatitis B on quality of life: a multinational study of utilities from infected and uninfected persons.** *Value in health : the journal of the International Society for Pharmacoeconomics and Outcomes Research* 2008; 11(3):527-538.
41. Longworth L, Young T, Buxton MJ, Ratcliffe J, Neuberger J, Burroughs A, et al. **Midterm cost-effectiveness of the liver transplantation program of England and Wales for three disease groups.** *Liver transplantation : official publication of the American Association for the Study of Liver Diseases and the International Liver Transplantation Society* 2003; 9(12):1295-1307.
42. NICE. **Alcohol-use disorders: alcohol dependence.** In: *Costing report*; 2011.
43. D'Amico G, Garcia-Tsao G, Pagliaro L. **Natural history and prognostic indicators of survival in cirrhosis: a systematic review of 118 studies.** *Journal of hepatology* 2006; 44(1):217-231.
44. Bennett WG, Inoue Y, Beck JR, Wong JB, Pauker SG, Davis GL. **Estimates of the cost-effectiveness of a single course of interferon-alpha 2b in patients with histologically mild chronic hepatitis C.** *Annals of internal medicine* 1997; 127(10):855-865.
45. Schutte K, Schulz C, Poranzke J, Antweiler K, Bornschein J, Bretschneider T, et al. **Characterization and prognosis of patients with hepatocellular carcinoma (HCC) in the non-cirrhotic liver.** *BMC gastroenterology* 2014; 14:117.
46. British Medical Association, Royal Pharmaceutical Society of Great Britain. **British National Formulary 66th Edition.** September (66) ed. London: BMJ Group and RPS Publishing; 2013.
47. Imamura H, Matsuyama Y, Tanaka E, Ohkubo T, Hasegawa K, Miyagawa S, et al. **Risk factors contributing to early and late phase intrahepatic recurrence of hepatocellular carcinoma after hepatectomy.** *Journal of hepatology* 2003; 38(2):200-207.
48. Longworth L, Young T, Buxton MJ, Ratcliffe J, Neuberger J, Burroughs A, et al. **Midterm cost-effectiveness of the liver transplantation program of England and Wales for three disease groups.** *Liver transplantation : official publication of the American Association for the Study of Liver Diseases and the International Liver Transplantation Society* 2003; 9(12):1295-1307.
49. Ouwens JP, van Enkevort PJ, TenVergert EM, Bonsel GJ, van der Bij W, Haagsma EB, et al. **The cost effectiveness of lung transplantation compared with that of heart and liver transplantation in the Netherlands.** *Transplant international : official journal of the European Society for Organ Transplantation* 2003; 16(2):123-127.
50. Department of Health. **NHS Reference Costs 2013 to 2014.** In. London: Department of Health; 2014.
51. PSSRU. **Unit Costs of Health & Social Care 2014.** In. Edited by Curtis L: Personal Social Services Research Unit; 2014.
52. The Information Centre. **2006/07 UK General Practice Workload Survey.** In; 2007.
53. Stamuli E. **Cost-effectiveness of ultrasound elastography in the assessment of liver fibrosis.** In: *Centre for Evidence-Based Purchasing Economic Report*; 2009.
54. Wright M, Grieve R, Roberts J, Main J, Thomas HC, Investigators UKMHCT. **Health benefits of antiviral therapy for mild chronic hepatitis C: randomised controlled trial and economic evaluation.** *Health technology assessment* 2006; 10(21):1-113, iii.
55. Harman DJ. **Economic modelling of early TIPS insertion for acute variceal haemorrhage.** (Available from authors on request) 2014.

56. Morling JR, Fallowfield JA, Guha IN, Nee LD, Glancy S, Williamson RM, et al. **Using non-invasive biomarkers to identify hepatic fibrosis in people with type 2 diabetes mellitus: the Edinburgh type 2 diabetes study.** *Journal of hepatology* 2014; 60(2):384-391.
57. Chalasani N, Younossi Z, Lavine JE, Diehl AM, Brunt EM, Cusi K, et al. **The diagnosis and management of non-alcoholic fatty liver disease: practice Guideline by the American Association for the Study of Liver Diseases, American College of Gastroenterology, and the American Gastroenterological Association.** *Hepatology* 2012; 55(6):2005-2023.
58. George K RS, Collier J, Chapman R, Freeman J. **Management of abnormal LFT in asymptomatic patients.** *BSG Guidelines*.
59. Professor James Neuberger DAG, Professor Chris DAY, Dr Sushma Saxseena. **Guidelines on the use of Liver Biopsy in Clinical Practice.** *BSG Guidelines in Gastroenterology*. 2004.
60. Tripathi. **UK Guidelines on the management of variceal bleeding in cirrhotic patients.** *BSG guidelines* 2015.
61. EASL. **EASL-EORTC Clinical Practice Guidelines: Management of Hepatocellular Carcinoma.** *Journal of hepatology* 2012; Vol. 56:908-943.
62. Ratziu V, Giral P, Jacqueminet S, Charlotte F, Hartemann-Heurtier A, Serfaty L, et al. **Rosiglitazone for nonalcoholic steatohepatitis: one-year results of the randomized placebo-controlled Fatty Liver Improvement with Rosiglitazone Therapy (FLIRT) Trial.** *Gastroenterology* 2008; 135(1):100-110.
63. NICE. **Alcohol use disorders: diagnosis, assessment and management of harmful drinking and alcohol dependence.** *NICE clinical guideline 115* 2011.
64. Moore KP, Aithal GP. **Guidelines on the management of ascites in cirrhosis.** *Gut* 2006; 55 Suppl 6:vi1-12.
65. American Association for the Study of Liver D, European Association for the Study of the L. **Hepatic encephalopathy in chronic liver disease: 2014 practice guideline by the European Association for the Study of the Liver and the American Association for the Study of Liver Diseases.** *Journal of hepatology* 2014; 61(3):642-659.
66. NICE. **Rifaximin for preventing episodes of overt hepatic encephalopathy.** *NICE technology appraisal guidance 337* 2015.
67. Short JB, E, James, M. **HCC in 2010; are we offering the appropriate therapy?** *BSG 2011 Abstract submission* 2011.
68. D'Amico G, Pasta L, Morabito A, D'Amico M, Caltagirone M, Malizia G, et al. **Competing risks and prognostic stages of cirrhosis: a 25-year inception cohort study of 494 patients.** *Alimentary pharmacology & therapeutics* 2014; 39(10):1180-1193.
69. EASL. **EASL-ALEH Clinical Practice Guidelines: Non-invasive tests for evaluation of liver disease severity and prognosis.** *Journal of hepatology* 2015; 63(1):237-264.
70. NICE. **Alcohol-use disorders: alcohol dependence. Costing report.** In; 2011.
71. Taylor MC, Greig PD, Detsky AS, McLeod RS, Abdoh A, Krahn MD. **Factors associated with the high cost of liver transplantation in adults.** *Canadian journal of surgery Journal canadien de chirurgie* 2002; 45(6):425-434.
72. Filipponi F, Pisati R, Cavicchini G, Ulivieri MI, Ferrara R, Mosca F. **Cost and outcome analysis and cost determinants of liver transplantation in a European National Health Service hospital.** *Transplantation* 2003; 75(10):1731-1736.
73. Best JH, Veenstra DL, Geppert J. **Trends in expenditures for Medicare liver transplant recipients.** *Liver transplantation : official publication of the American Association for the Study of Liver Diseases and the International Liver Transplantation Society* 2001; 7(10):858-862.
74. Lang K, Danchenko N, Gondek K, Shah S, Thompson D. **The burden of illness associated with hepatocellular carcinoma in the United States.** *Journal of hepatology* 2009; 50(1):89-99.
75. van Agthoven M, Metselaar HJ, Tilanus HW, de Man RA, JN IJ, Martin van Ineveld BM. **A comparison of the costs and effects of liver transplantation for acute and for chronic liver failure.** *Transplant international : official journal of the European Society for Organ Transplantation* 2001; 14(2):87-94.

76. van der Hilst CS, Ijtsma AJ, Slooff MJ, Tenvergert EM. **Cost of liver transplantation: a systematic review and meta-analysis comparing the United States with other OECD countries.** *Medical care research and review : MCRR* 2009; 66(1):3-22.
77. Lin OS, Keeffe EB, Sanders GD, Owens DK. **Cost-effectiveness of screening for hepatocellular carcinoma in patients with cirrhosis due to chronic hepatitis C.** *Alimentary pharmacology & therapeutics* 2004; 19(11):1159-1172.
78. Taylor MC, Greig PD, Detsky AS, McLeod RS, Abdoh A, Krahn MD. **Factors associated with the high cost of liver transplantation in adults.** *Canadian Journal of Surgery* 2002; 45(6):425-434.
79. Singh S, Allen AM, Wang Z, Prokop LJ, Murad MH, Loomba R. **Fibrosis Progression in Nonalcoholic Fatty Liver vs Nonalcoholic Steatohepatitis: A Systematic Review and Meta-analysis of Paired-Biopsy Studies.** *Clinical Gastroenterology and Hepatology* 2014.
